# Supplementary material for: Chalcogen atom modulated persistent room-temperature phosphorescence through intramolecular electronic coupling
Source: Royal Society of Chemistry journal article supplement (doi:10.1039/c8cc04734k), 2018-01-01
Supplement: c8cc04734k1.pdf [file c8cc04734k1.pdf]

## Supporting Information

*for*

### **Chalcogen Atoms Modulated Persistent Room-Temperature Phosphorescence through Intramolecular Electronic Coupling**

Letian Xu,<sup>a</sup> Guoping Li,<sup>a</sup> Tao Xu,<sup>b</sup> Weidong Zhang,<sup>a</sup> Sikun Zhang,<sup>a</sup> Shiwei Yin,<sup>b</sup>  
Zhongfu An,<sup>c</sup> and Gang He<sup>\*ab</sup>

<sup>a</sup>Frontier Institute of Science and Technology, State Key Laboratory for Strength and Vibration of Mechanical Structures, Xi'an Jiaotong University, Xi'an, Shaanxi province, 710054 (China). E-mail: ganghe@mail.xjtu.edu.cn (G. He)

<sup>b</sup>Key Laboratory of Applied Surface and Colloid Chemistry of Ministry of Education, School of Chemistry & Chemical Engineering, Shaanxi Normal University, Xi'an, Shaanxi province, 710062 (China).

<sup>c</sup>Key Laboratory of Flexible Electronics (KLOFE) & Institute of Advanced Materials (IAM), Nanjing Tech University, Nanjing, Jiangsu province, 211800 (China).

## Contents

|                                                                                                    |     |
|----------------------------------------------------------------------------------------------------|-----|
| 1. Materials and instrumentation .....                                                             | S3  |
| 2. Synthetic procedures.....                                                                       | S4  |
| 3. UV-vis, excitation and emission spectra of <b>PEPCz</b> in solution.....                        | S8  |
| 4. Phosphorescence spectra of <b>PEPCz</b> in 2-Me-THF at 77 K .....                               | S14 |
| 5. PL and pRTP spectra of <b>PEPCz</b> in PMMA film.....                                           | S15 |
| 6. XRD patterns of <b>PEPCz</b> (E= O, S, Se).....                                                 | S16 |
| 7. PL and pRTP spectra of <b>PEPCz</b> (E= O, S, Se) in amorphous state.....                       | S16 |
| 8. Lifetime decay profiles and data of <b>PEPCz</b> in crystalline state.....                      | S18 |
| 9. pRTP photographs of <b>PEPCz</b> in crystalline state .....                                     | S23 |
| 10. Time-resolved excitation spectra and pRTP mapping of <b>PSePCz</b> in crystalline state.....   | S24 |
| 11. pRTP spectra under different excitation wavelength of <b>PSePCz</b> in crystalline state ..... | S25 |
| 12. pRTP spectra of <b>PEPCz</b> in the air and argon.....                                         | S26 |
| 13. Single-crystal X-ray structure determination .....                                             | S27 |
| 14. Intermolecular interactions of <b>PEPCz</b> (E = O, S, Se) in crystal .....                    | S33 |
| 15. The distances of the n and $\pi$ groups of some pRTP molecules in literature.....              | S36 |
| 16. Computational methods and results.....                                                         | S40 |
| 17. Color-encryption application.....                                                              | S48 |
| 18. SEM of <b>PSePCz</b> aggregates in 50% volume fractions of EtOH in water .....                 | S49 |
| 19. The pRTP sensing application details .....                                                     | S50 |
| 20. The $^1\text{H}$ and $^{13}\text{C}$ NMR spectra of <b>PEPCz</b> in $\text{CDCl}_3$ .....      | S52 |
| 21. Coordinates of molecular structures .....                                                      | S56 |
| Reference.....                                                                                     | S64 |

## Experimental Section

### 1. Materials and instrumentation

**General.** THF was freshly distilled under argon from sodium. DMF and EtOH were freshly distilled under argon from calcium hydride. Bromobenzene (98%), 4-fluorophenol (99%), 4-fluorobenzenboronic acid (98%), potassium tert-butanolate (98%), diphenyl diselenide (97%), diphenyl disulfide (98%), 1-fluoro-4-iodobenzene (98%), potassium hydroxide (98%), copper (99%), copper sulfate pentahydrate (98%), sodium borohydride (98%), tellurium (99%), carbazole (97%) were purchased from Energy Chemical Inc. 1,10-Phenanthroline (99%) purchased from Acros. 1-fluoro-4-phenoxybenzene,<sup>1</sup> 4-fluorophenyl phenyl sulfide,<sup>2</sup> 4-fluorophenyl phenyl selenide,<sup>2</sup> 4-fluorophenyl phenyl telluride,<sup>2</sup> phenyl magnesium bromide,<sup>3</sup> diphenyl ditelluride<sup>3</sup> were prepared according to literature procedures. If no other special indicated, other reagents and solvents were used as commercially available without further purification. Column chromatographic purification of products was accomplished using 200-300 mesh silica gel.

NMR spectra were measured on a Bruker Avance-400 spectrometer in the solvents indicated; chemical shifts are reported in units (ppm) by assigning TMS resonance in the <sup>1</sup>H spectrum as 0.00 ppm, CDCl<sub>3</sub> resonance in the <sup>13</sup>C spectrum as 77.0 ppm. Coupling constants are reported in Hz with multiplicities denoted as s (singlet), d (doublet), t (triplet), q (quartet) and m (multiplet). UV-vis measurements were performed using DH-2000-BAL Scan spectrophotometer. Steady-state phosphorescence spectra and excitation spectra were measured using Hitachi F-4600. The photoluminescence quantum efficiency, time-resolved emission spectra and lifetime were obtained using Edinburgh FLSP980 fluorescence spectrophotometer equipped with a xenon lamp (Xe900), a picosecond pulsed laser (EPL-375), a microsecond flash-lamp (μF900) and an integrating sphere, respectively. Single crystal X-ray diffraction analysis was carried out on a Bruker apex duo equipment. Elemental analysis was conducted using a Euro vector EA3000 Analyzer. High-resolution mass spectra (HRMS) were collected on a Bruker maxis UHR-TOF mass

spectrometer in an ESI positive mode. Powder X-ray diffraction patterns were recorded on a Bruker-D8 Advanced X-ray diffractometer with Cu K $\alpha$  radiation. The **PSePCz** aggregates in EtOH-water mixture were prepared using a typical method: the **PSePCz** (7 mg) was dispersed into water (5 ml), then EtOH (5 ml) was added rapidly with stirring. To accelerate the aggregation, the suspension was sonicated 10 min. The resulting suspension was kept at room temperature and used for sensing applications and SEM measurements. The luminescent photos were taken by a Nikon D5100 camera under the irradiation of hand-held UV lamp at room temperature.

## 2. Synthetic procedures

Synthesis of 9-(4-phenoxyphenyl)-9*H*-carbazole (POPCz).

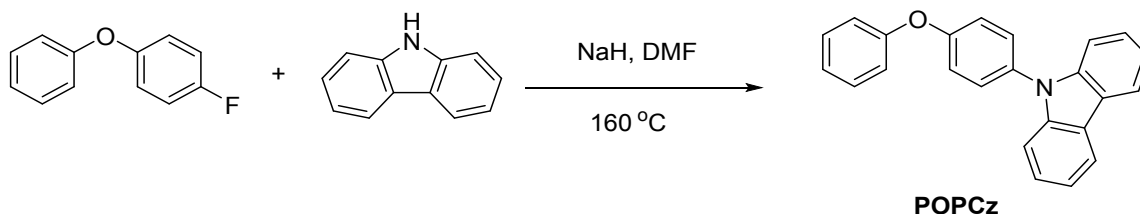

To a solution of sodium hydride (0.51 g, 21.25 mmol) in dry DMF (15 mL) at room temperature was added a solution of carbazole (2.13 g, 12.75 mmol) in dry DMF (13 mL). After the reaction mixture was stirred at room temperature for 30 min, 1-fluoro-4-phenoxybenzene (1.60 g, 8.50 mmol) in 10 mL dry DMF was added, and the mixture was stirred at 160 °C overnight. After the mixture was cooled to room temperature, the reaction was quenched with ice water and the precipitate was filtered. The product was purified by column chromatography (PE/DCM=5/1). Yield: 51%. The crystal sample was recrystallization from dichloromethane and hexane.

$^1\text{H}$  NMR (400 MHz,  $\text{CDCl}_3$ ):  $\delta$  8.14 (d, 2H), 7.49-7.45 (m, 2H), 7.43-7.39 (m, 6H), 7.30-7.26 (m, 2H), 7.21-7.12 (m, 5H);  $^{13}\text{C}$  NMR (100 MHz,  $\text{CDCl}_3$ ):  $\delta$  156.68, 156.64, 141.08, 132.41, 129.96, 128.60, 125.90, 123.89, 123.20, 120.29, 119.82, 119.55, 119.43, 109.65. HRMS,  $m/z$ :  $[\text{M}^+]$  calcd for  $\text{C}_{24}\text{H}_{17}\text{NO}$ , 335.1310; found, 335.1300; elemental analysis

calcd (%) for C<sub>24</sub>H<sub>17</sub>NO: C, 85.94; H, 5.11; N, 4.18; found: C, 85.85; H, 5.10; N, 4.18.

Melt point of POPCz crystal: 122.2 ~ 122.9 °C.

Synthesis of 9-(4-(phenylthio)phenyl)-9*H*-carbazole (PSPCz).

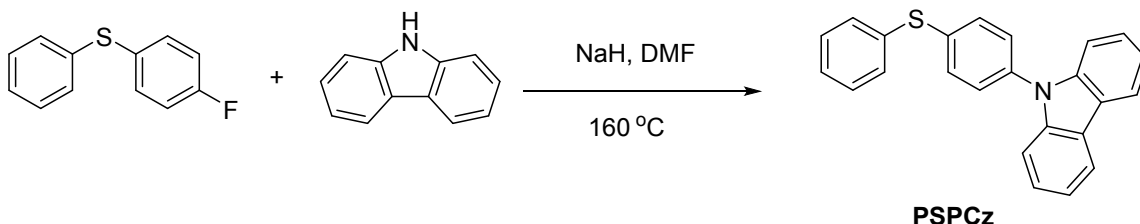

To a solution of sodium hydride (0.57 g, 24.40 mmol) in dry DMF (20 mL) at room temperature was added a solution of carbazole (2.45 g, 14.64 mmol) in dry DMF (15 mL). After the reaction mixture was stirred at room temperature for 30 min, 4-fluorophenyl phenyl sulfide (1.82 g, 9.76 mmol) in 10 mL dry DMF was added, and the mixture was stirred at 160 °C overnight. After the mixture was cooled to room temperature, the reaction was quenched with ice water and the precipitate was filtered. The product was purified by column chromatography (PE/DCM=5/1). Yield: 67%. The crystal sample was recrystallization from dichloromethane and hexane.

<sup>1</sup>H NMR (400 MHz, CDCl<sub>3</sub>): δ 8.15 (d, 2H), 7.53-7.49 (m, 6H), 7.42-7.39 (m, 6H), 7.38-7.35 (m, 1H), 7.32-7.28 (m, 2H); <sup>13</sup>C NMR (100 MHz, CDCl<sub>3</sub>): δ 140.72, 136.28, 135.78, 134.59, 132.13, 131.37, 129.47, 127.80, 127.65, 125.97, 123.44, 120.32, 120.06, 109.71. HRMS, m/z: [M<sup>+</sup>] calcd for C<sub>24</sub>H<sub>17</sub>NS, 351.1082; found, 351.1082; elemental analysis calcd (%) for C<sub>24</sub>H<sub>17</sub>NS: C, 82.02; H, 4.88; N, 3.99; S, 9.12; found: C, 82.27; H, 4.96; N, 4.19; S, 8.93. Melt point of PSPCz crystal: 101.3 ~ 101.6 °C.

Synthesis of 9-(4-(phenylselanyl)phenyl)-9*H*-carbazole (PSePCz).

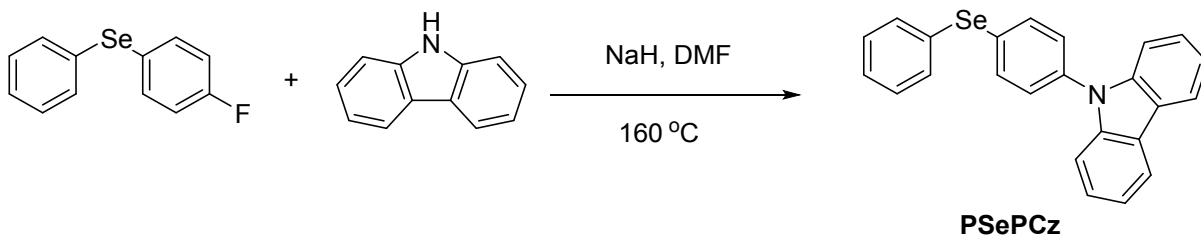

To a solution of sodium hydride (0.65 g, 27.00 mmol) in dry DMF (20 mL) at room temperature was added a solution of carbazole (2.71 g, 16.20 mmol) in dry DMF (17 mL). After the reaction mixture was stirred at room temperature for 30 min, 4-fluorophenyl phenyl selenide (2.72 g, 10.80 mmol) in 10 mL dry DMF was added, and the mixture was stirred at 160 °C overnight. After the mixture was cooled to room temperature, the reaction was quenched with ice water and the precipitate was filtered. The product was purified by column chromatography (PE/DCM=5/1) and crystal was obtained through recrystallization from hexane and DCM. Yield: 74%. The crystal sample was recrystallization from dichloromethane and hexane.

<sup>1</sup>H NMR (400 MHz, CDCl<sub>3</sub>): δ 8.13 (d, 2H), 7.64-7.61 (m, 4H), 7.47-7.45 (m, 2H), 7.41-7.40 (m, 4H), 7.38-7.35 (m, 3H), 7.30-7.26 (m, 2H); <sup>13</sup>C NMR (100 MHz, CDCl<sub>3</sub>): δ 140.63, 136.66, 133.89, 133.51, 130.71, 130.14, 129.58, 127.96, 127.76, 125.96, 123.40, 120.31, 120.04, 109.69. HRMS, *m/z*: [M<sup>+</sup>] calcd for C<sub>24</sub>H<sub>17</sub>NSe, 399.0526; found, 399.0531; elemental analysis calcd (%) for C<sub>24</sub>H<sub>17</sub>NSe: C, 72.36; H, 4.30; N, 3.52; found: C, 72.38; H, 4.36; N, 3.50. Melt point of PSePCz crystal: 98.1 ~ 98.3 °C.

Synthesis of 9-(4-(phenyltellanyl)phenyl)-9*H*-carbazole (PTePCz).

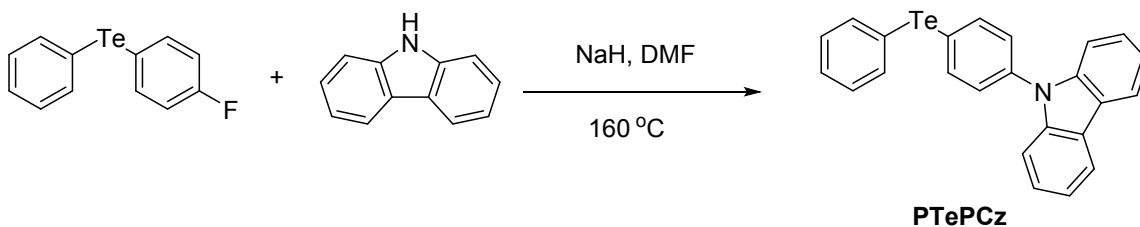

To a solution of sodium hydride (0.16 g, 6.75 mmol) in dry DMF (15 mL) at room temperature was added a solution of carbazole (0.68 g, 4.05 mmol) in dry DMF (10 mL). After the reaction mixture was stirred at room temperature for 30 min, 4-fluorophenyl phenyl telluride (0.81 g, 2.70 mmol) in 6 mL dry DMF was added, and the mixture was stirred at 160 °C overnight. After the mixture was cooled to room temperature, the reaction was quenched with ice water and the precipitate was filtered. The product was purified by column chromatography (PE/DCM=5/1) Yield: 56%. The crystal sample was recrystallization from dichloromethane and hexane.

<sup>1</sup>H NMR (400 MHz, CDCl<sub>3</sub>): δ 8.13 (d, 2H), 7.87-7.84 (m, 4H), 7.43-7.39 (m, 6H), 7.38-7.35 (m, 1H), 7.32-7.26 (m, 4H); <sup>13</sup>C NMR (100 MHz, CDCl<sub>3</sub>): δ 140.58, 138.78, 138.70, 137.32, 129.73, 128.34, 127.92, 125.95, 123.42, 120.31, 120.06, 114.07, 113.60, 109.71. HRMS, m/z: [M<sup>+</sup>] calcd for C<sub>24</sub>H<sub>17</sub>NTe, 449.0423; found, 449.0427; elemental analysis calcd (%) for C<sub>24</sub>H<sub>17</sub>NTe: C, 64.49; H, 3.83; N, 3.13; found: C, 64.43; H, 4.06; N, 3.36. Melt point of PTePCz crystal: 66.0 ~ 66.3 °C.

### 3. UV-vis, excitation and emission spectra of PEPCz in solution

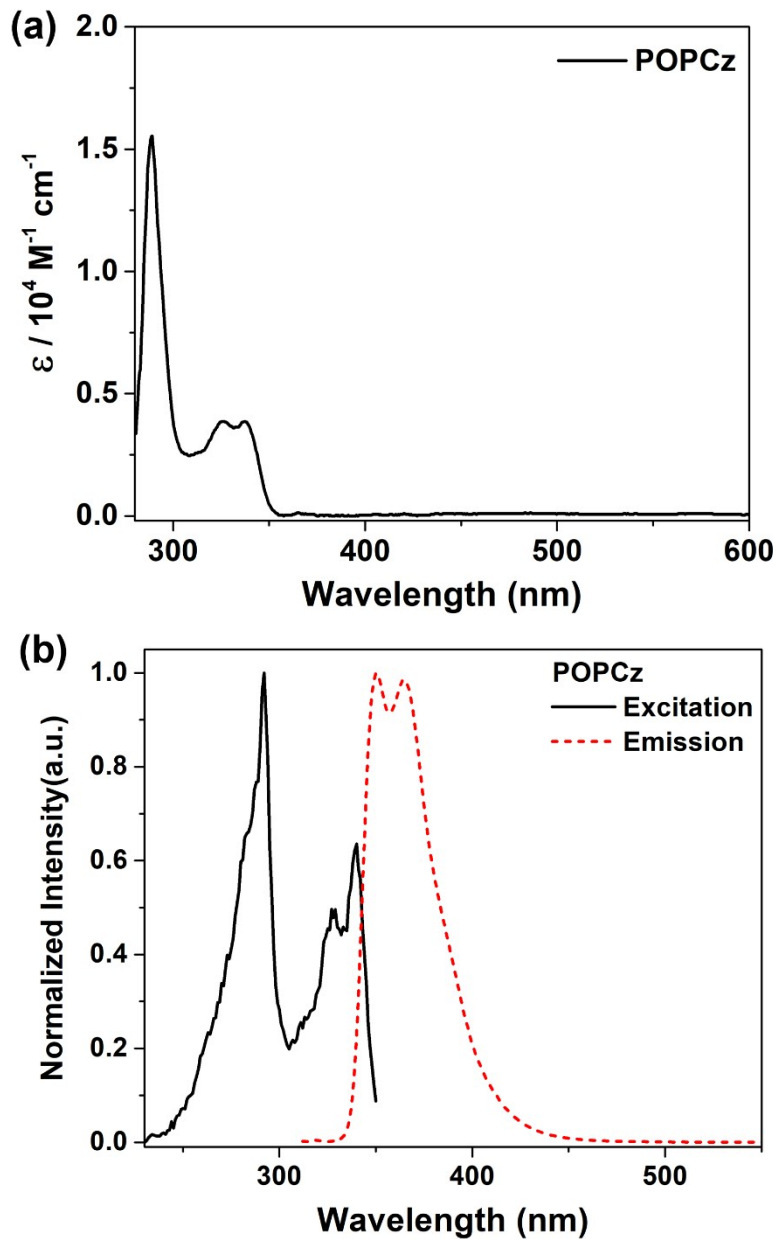

**Fig. S1** Photophysical spectra for **POPCz** in THF. (a) UV-Vis absorbance spectrum; (b) fluorescence excitation (solid line) and emission spectra (dashed line).  $[\text{POPCz}] = 3 \times 10^{-5}$  M.



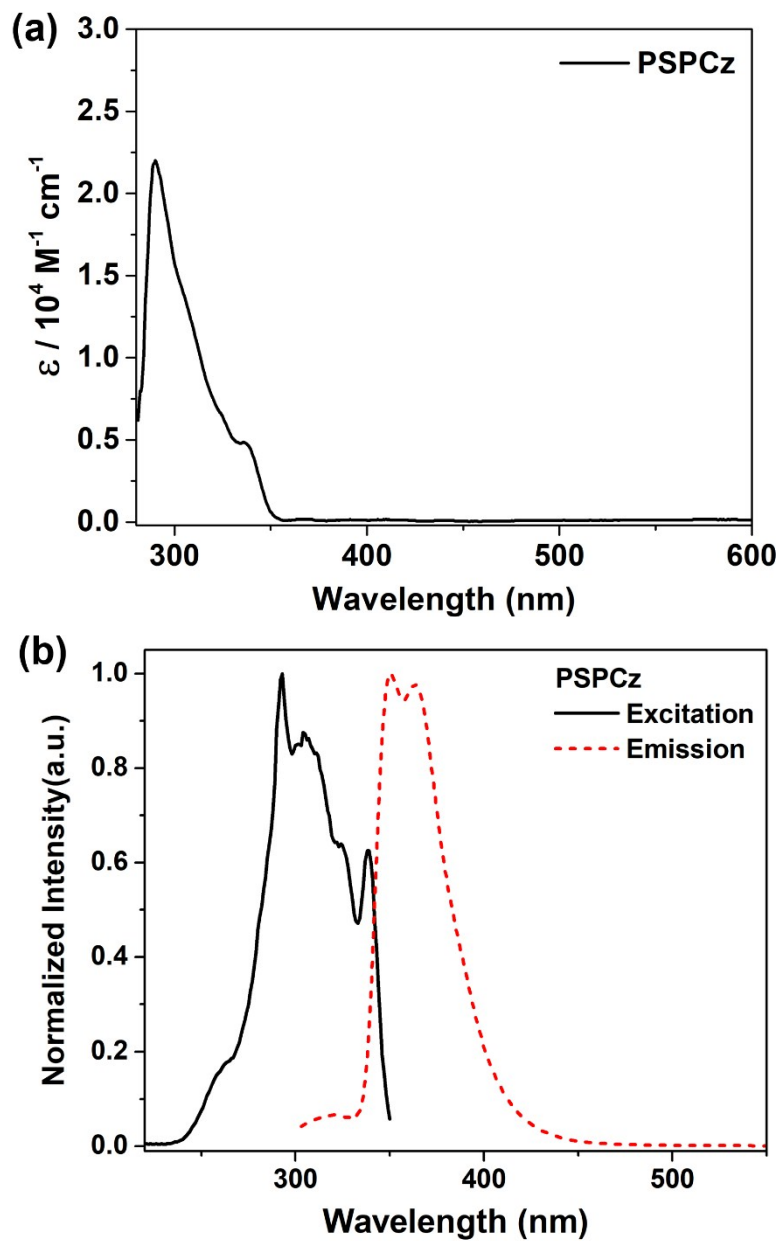

**Fig. S2** Photophysical spectra for **PSPCz** in THF. (a) UV-Vis absorbance spectrum; (b) fluorescence excitation (solid line) and emission spectra (dashed line).  $[\text{PSPCz}] = 3 \times 10^{-5} \text{ M}$ .

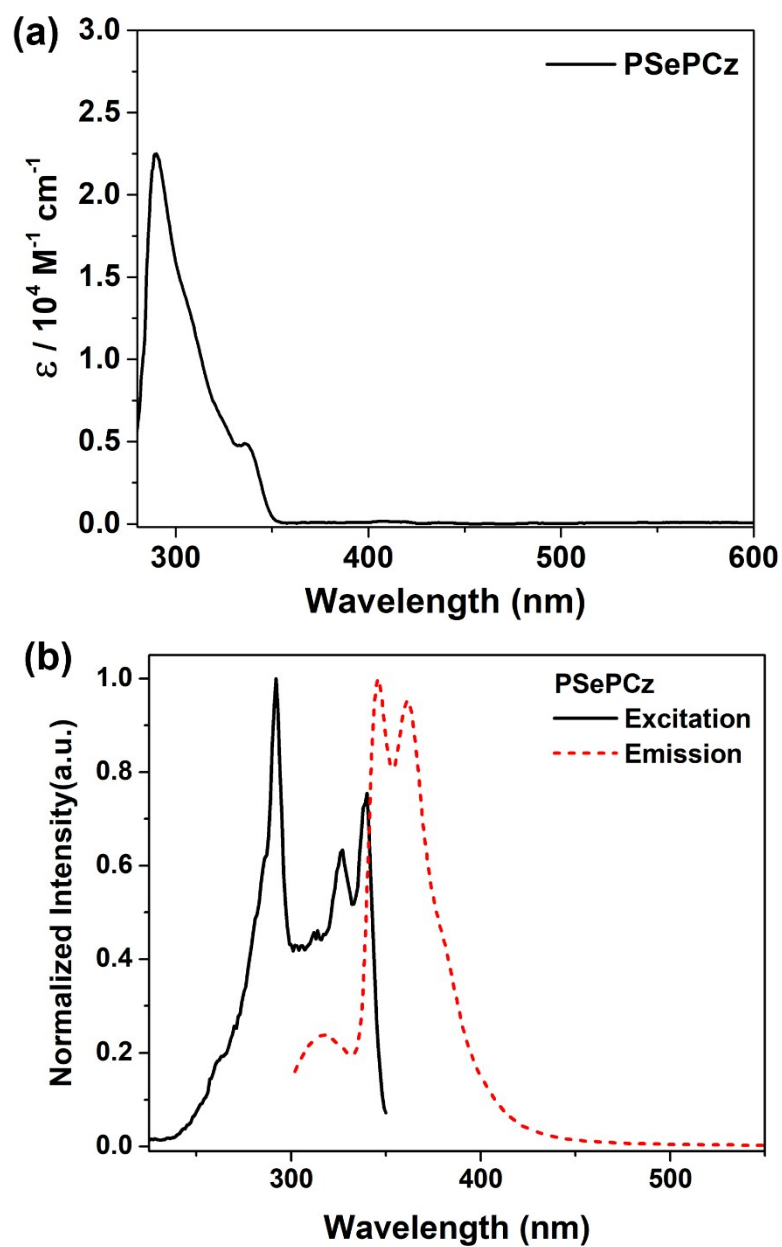

**Fig. S3** Photophysical spectra for **PSePCz** in THF. (a) UV-Vis absorbance spectrum; (b) fluorescence excitation (solid line) and emission spectra (dashed line).  $[\text{PSePCz}] = 3 \times 10^{-5}$  M.

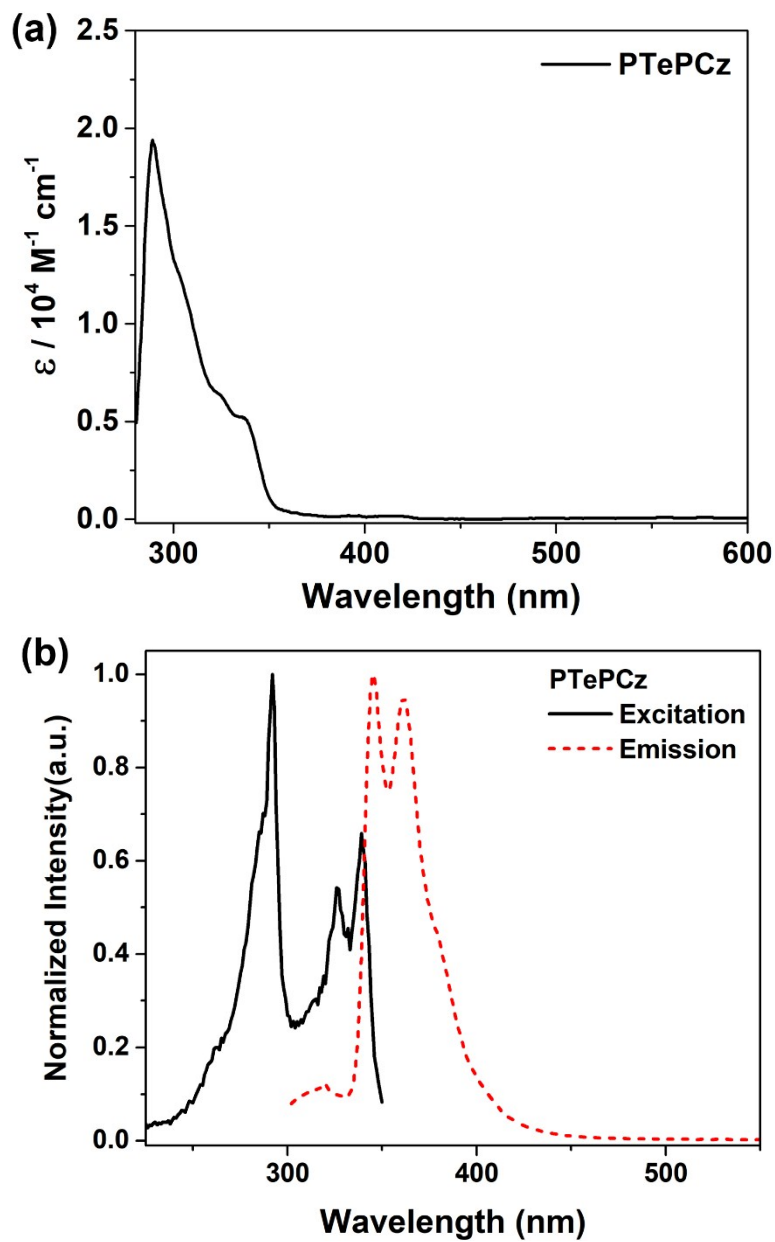

**Fig. S4** Photophysical spectra for **PTePCz** in THF. (a) UV-Vis absorbance spectrum; (b) fluorescence excitation (solid line) and emission spectra (dashed line).  $[\text{PTePCz}] = 3 \times 10^{-5} \text{ M}$ .

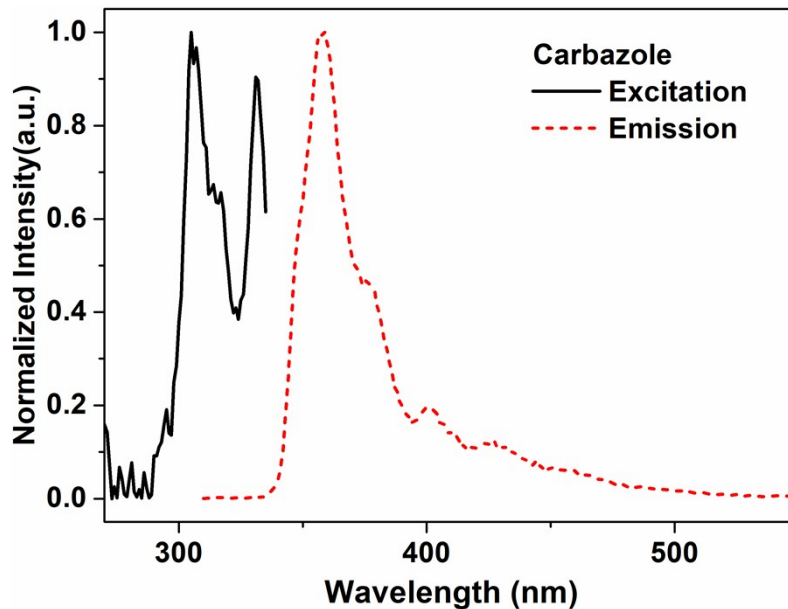

**Fig. S5** Photophysical spectra for **Carbazole** in THF. Fluorescence excitation (solid line) and emission spectra (dashed line).  $[\text{Carbazole}] = 3 \times 10^{-5} \text{ M}$ .

**Table S1.** Summarized absorption and emission data of **PEPCz** in solution.

| Compound | Absorption                    |                                                       |             | Emission wavelength |     |     |            |      |
|----------|-------------------------------|-------------------------------------------------------|-------------|---------------------|-----|-----|------------|------|
|          | $\lambda_{\text{ab}}$<br>(nm) | $\epsilon$<br>[ $10^4(\text{M}^{-1}\text{cm}^{-1})$ ] | Cyclohexane | Toluene             | DCM | THF | Chloroform | MeCN |
| POPCz    | 289                           | 1.55                                                  | 345         | 350                 | 354 | 350 | 353        | 354  |
|          | 326                           | 0.39                                                  | 361         | 365                 | 366 | 365 | 367        | 365  |
|          | 337                           | 0.39                                                  | --          | --                  | --  | --  | --         | --   |
| PSPCz    | 290                           | 2.2                                                   | 345         | 350                 | 354 | 350 | 354        | 353  |
|          | 336                           | 0.49                                                  | 361         | 365                 | 365 | 363 | 365        | 363  |
| PSePCz   | 289                           | 2.25                                                  | 342         | 348                 | 350 | 346 | 351        | 350  |
|          | 336                           | 0.49                                                  | 358         | 363                 | 365 | 361 | 364        | 363  |
| PTePCz   | 289                           | 1.94                                                  | 343         | 348                 | 349 | 345 | 350        | 350  |
|          | 337                           | 0.52                                                  | 359         | 364                 | 365 | 361 | 365        | 366  |



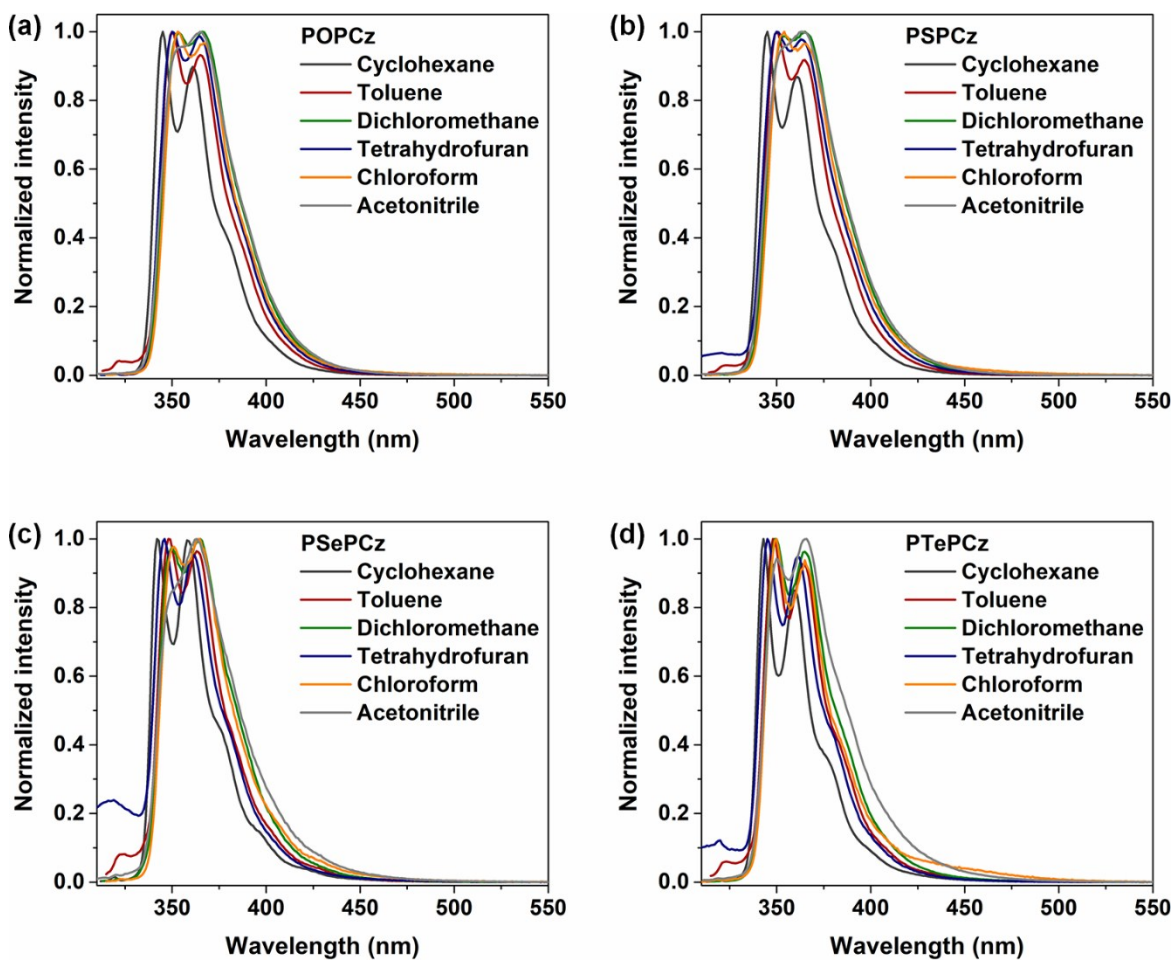

**Fig. S6** Photophysical properties of (a) **POPCz**, (b) **PSPCz**, (c) **PSePCz** and (d) **PTePCz** in different solutions. PL spectra of **POPCz**, **PSPCz**, **PSePCz** and **PTePCz** in six types of solvents (cyclohexane, toluene, dichloromethane, tetrahydrofuran, chloroform and acetonitrile) excited at 295 nm at room temperature.

#### 4. Phosphorescence spectra of PEPCz in 2-Me-THF at 77 K

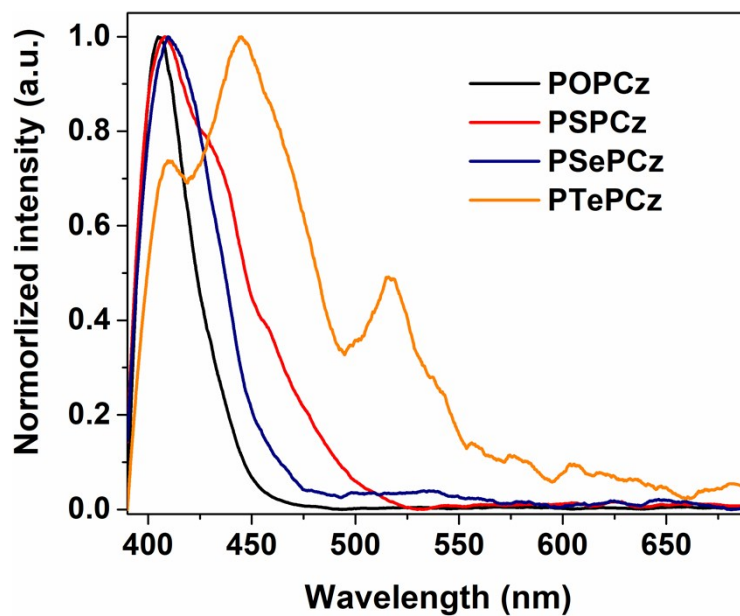

**Fig. S7** Phosphorescence spectra of **POPCz**, **PSpCz**, **PSePCz** and **PTePCz** in 2-Me-THF ( $1.0 \times 10^{-3}$  M) at 77 K.

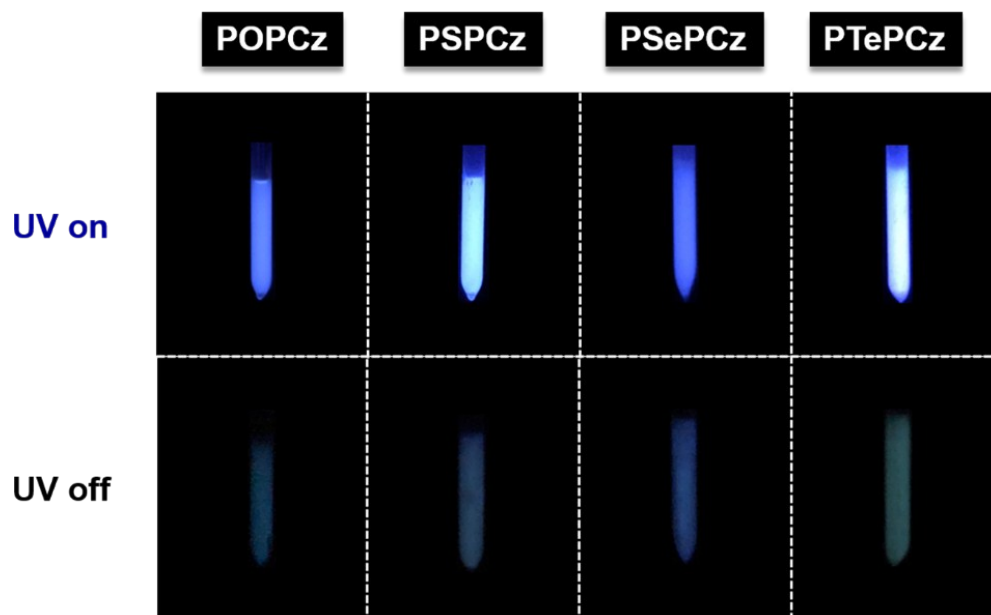

**Fig. S8** Photographs of **POPCz**, **PSpCz**, **PSePCz** and **PTePCz** in dilute 2-Me-THF solution ( $1.0 \times 10^{-3}$  M) at 77 K before and after excitation light source at 365 nm was switched off.

## 5. PL and pRTP spectra of PEPCz in PMMA film

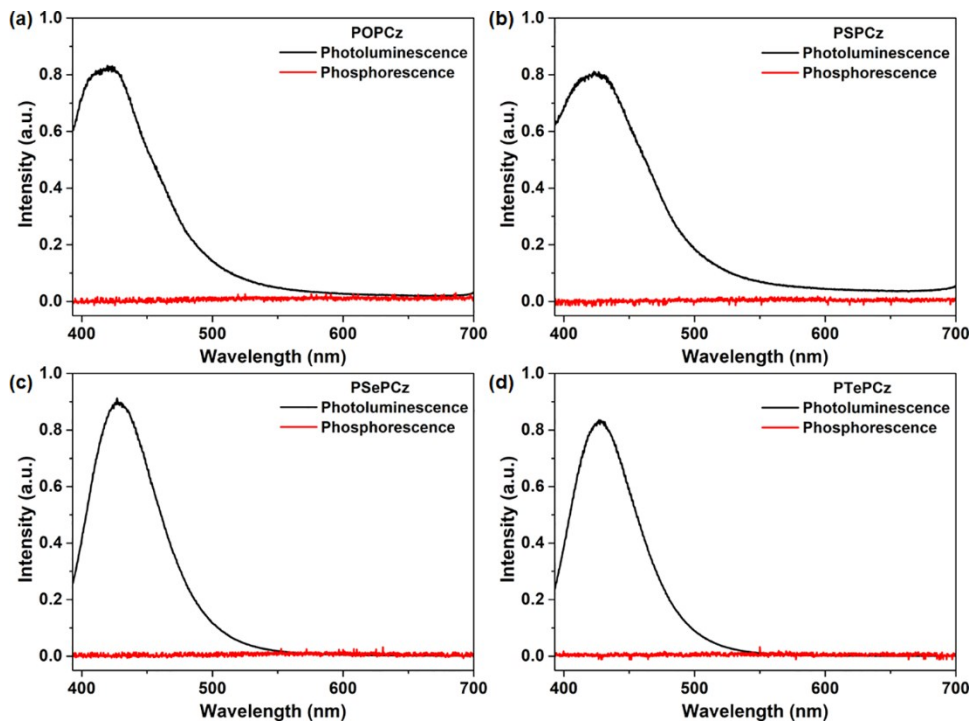

**Fig. S9** Photoluminescence and phosphorescence spectra in films of 5 wt% PEPCz doped in PMMA under ambient conditions. Excitation wavelength: 365 nm.

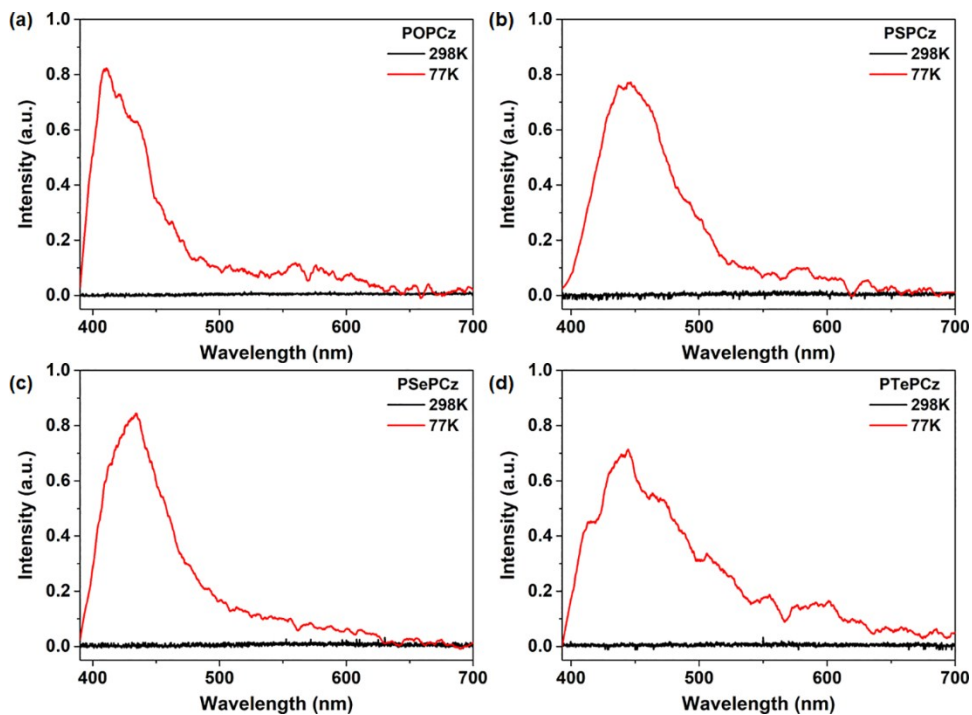



**Fig. S10** Phosphorescence spectra in films of 5 wt% **PEPCz** doped in PMMA under air conditions at 298K and 77K. Excitation wavelength: 365 nm.

## 6. XRD patterns of PEPCz (E= O, S, Se)

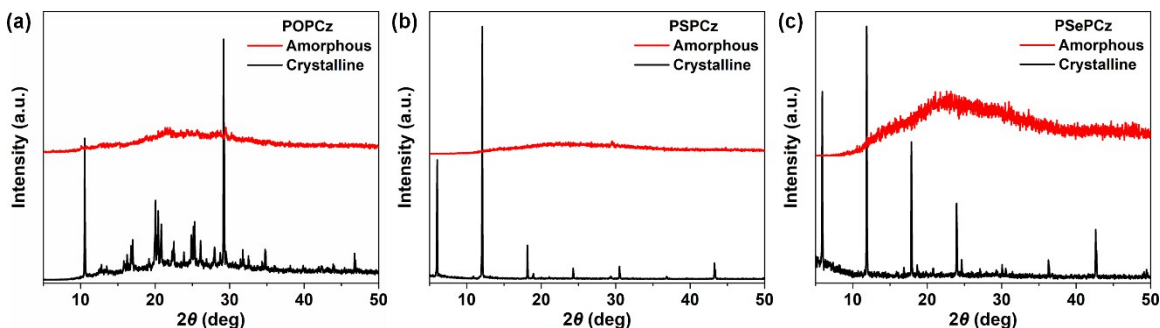

**Fig. S11** Powder X-ray diffraction of (a) **POPCz**, (b) **PSPCz** and (c) **PSePCz** crystalline (black line) and amorphous (red line) glass.

## 7. PL and pRTP spectra of PEPCz (E= O, S, Se) in amorphous state

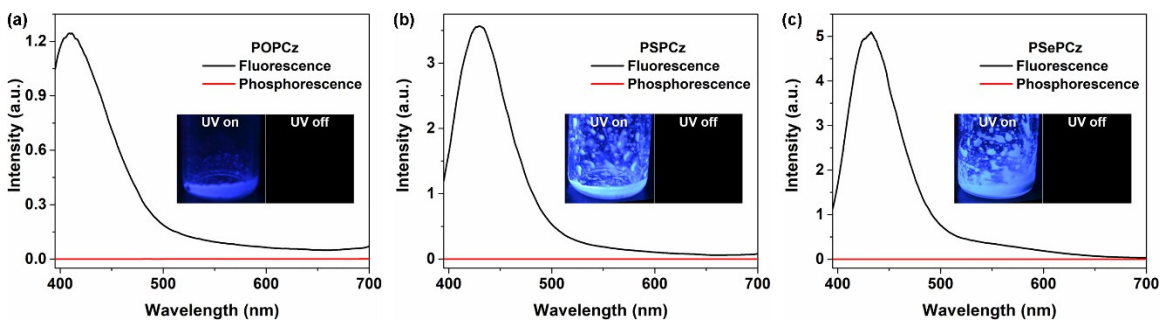

**Fig. S12** Steady-state photoluminescence (black line) and phosphorescence spectra (red line) of amorphous (a) **POPCz**, (b) **PSPCz** and (c) **PSePCz** glass at room temperature excited at 365 nm. Inset: Photographs of amorphous **POPCz**, **PSPCz** and **PSePCz** glass at room temperature before and after the irradiation of 365 nm.

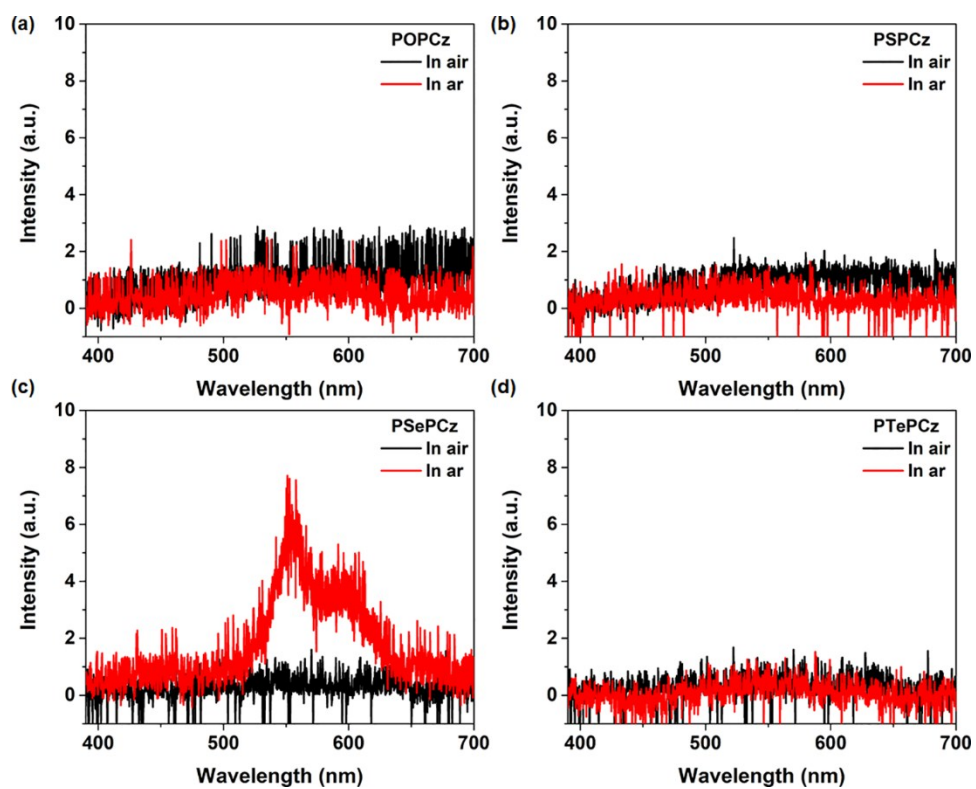

**Fig. S13** Phosphorescence spectra of amorphous **PEPCz** at room temperature in air and argon atmosphere respectively. Excitation wavelength: 365 nm.

## 8. Lifetime decay profiles and data of PEPCz in crystalline state

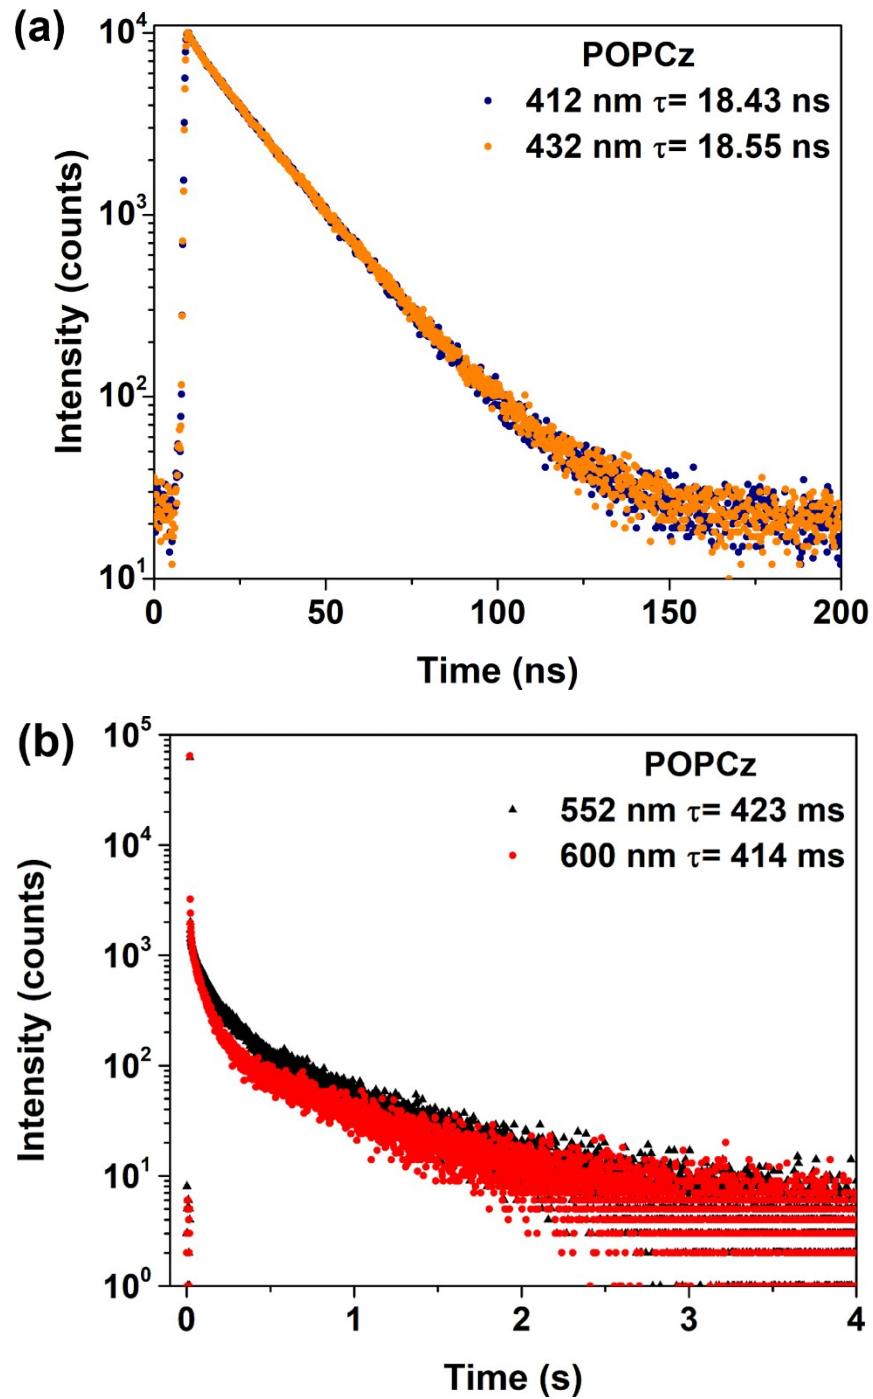

**Fig. S14** Lifetime decay profiles of (a) the fluorescence emission bands and (b) the ultralong phosphorescence bands of **POPCz** crystalline powders under ambient conditions.

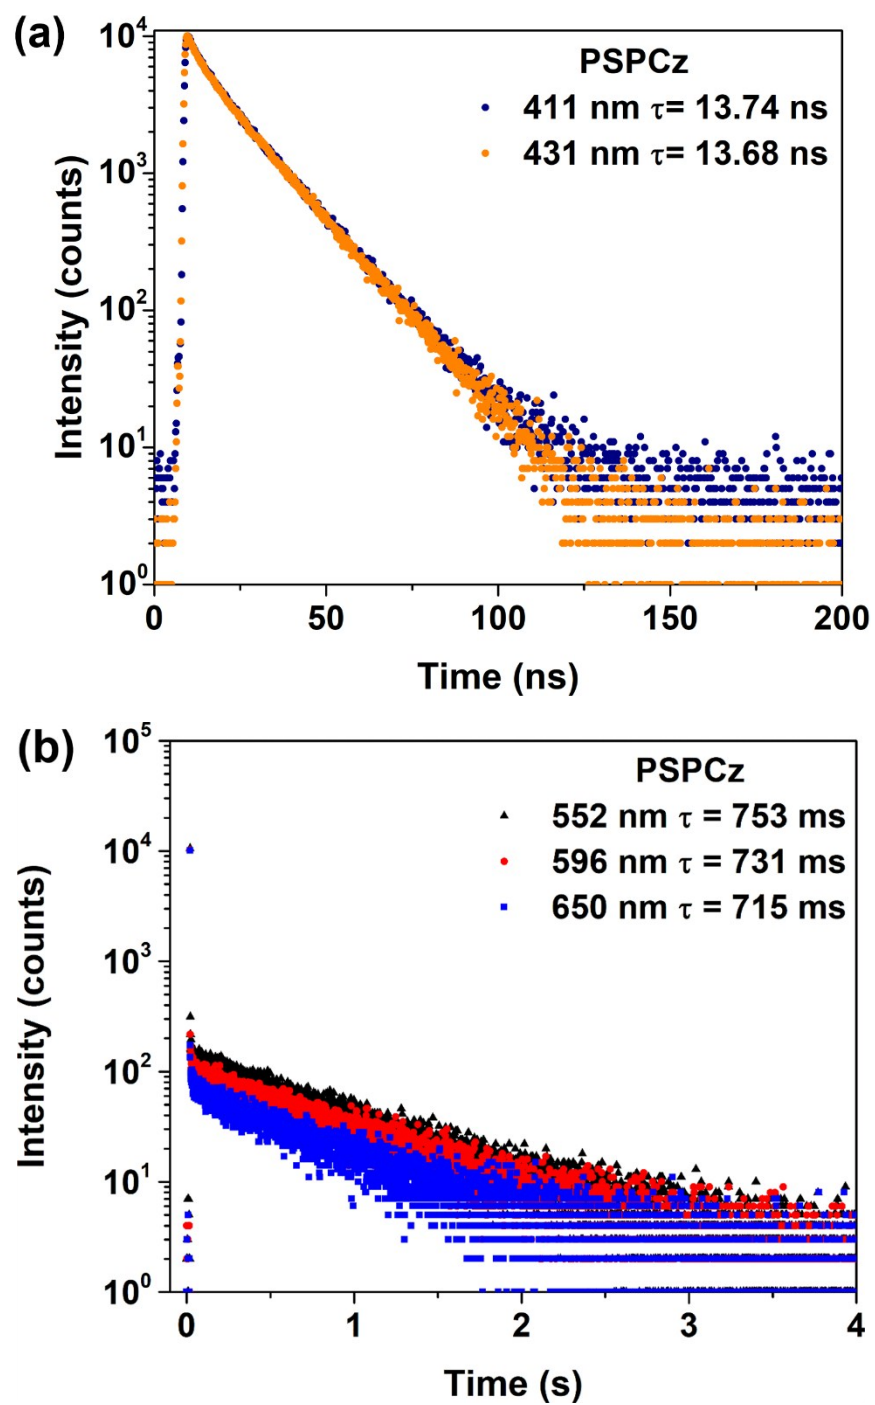

**Fig. S15** Lifetime decay profiles of (a) the fluorescence emission bands and (b) the ultralong phosphorescence bands of **PSPCz** crystalline powders under ambient conditions.

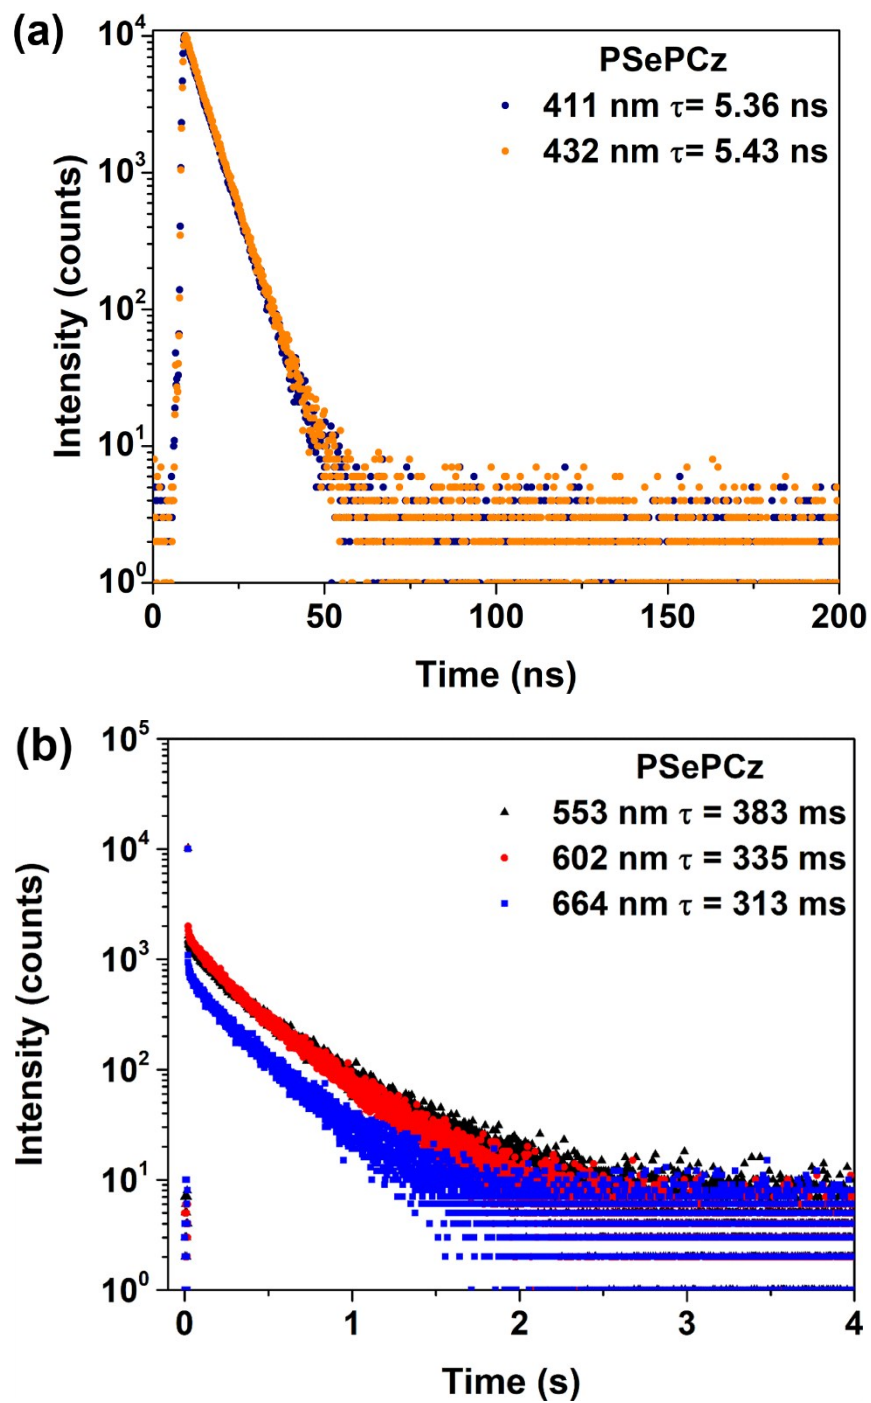

**Fig. S16** Lifetime decay profiles of (a) the fluorescence emission bands and (b) the ultralong phosphorescence bands of **PSePCz** crystalline powders under ambient conditions.

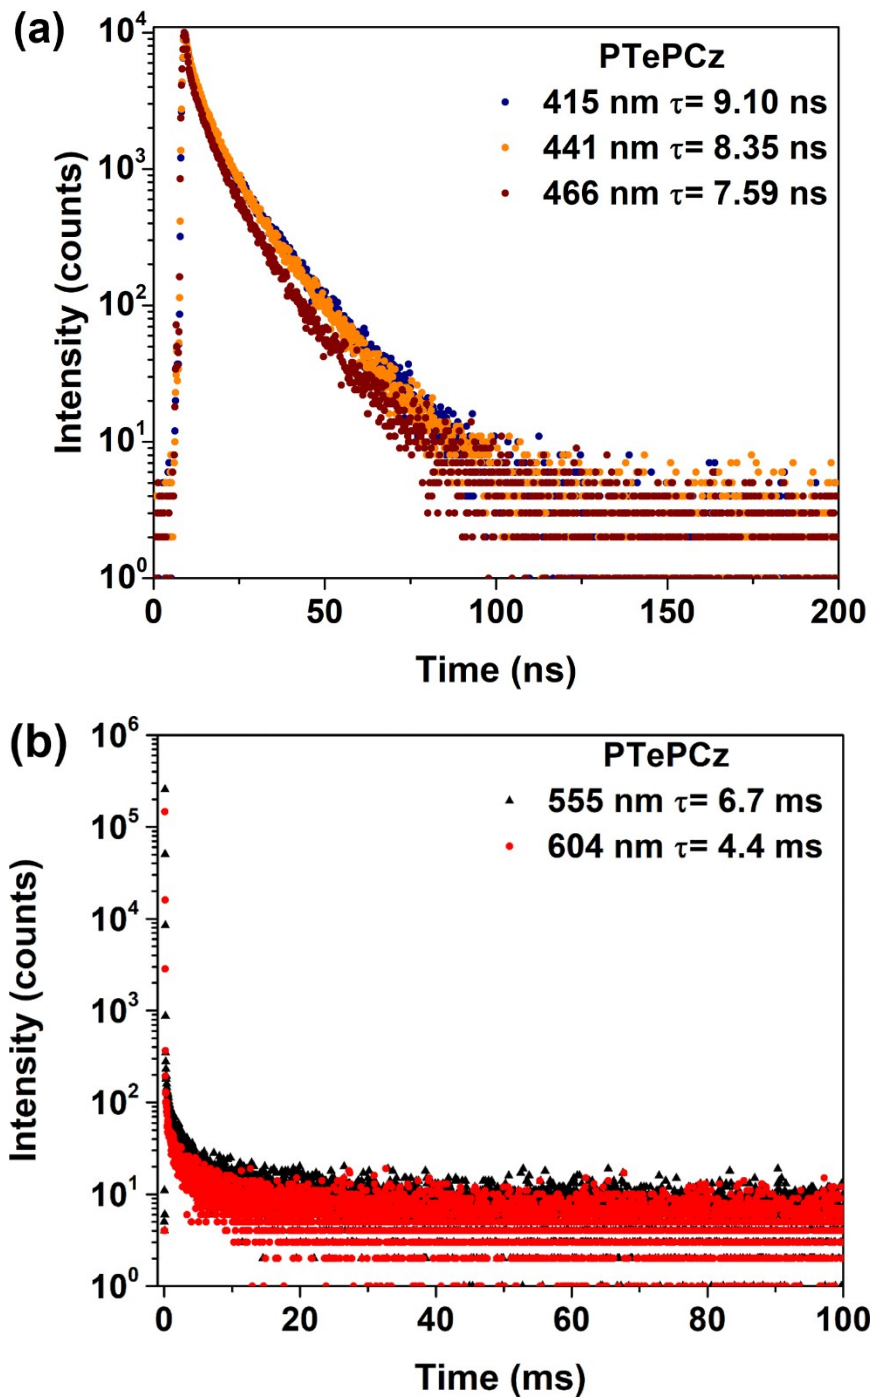

**Fig. S17** Lifetime decay profiles of (a) the fluorescence emission bands and (b) the ultralong phosphorescence bands of **PTePCz** crystalline powders under ambient conditions.

**Table S2.** Photoluminescence lifetimes ( $\tau$ ) of **PEPCz** in crystalline state.

| Compound | Wavelength (nm) | Fluorescence  |                    |               |                    | Phosphorescence |                    |               |                    |
|----------|-----------------|---------------|--------------------|---------------|--------------------|-----------------|--------------------|---------------|--------------------|
|          |                 | $\tau_1$ (ns) | A <sub>1</sub> (%) | $\tau_2$ (ns) | A <sub>2</sub> (%) | $\tau_1$ (ms)   | A <sub>1</sub> (%) | $\tau_2$ (ms) | A <sub>2</sub> (%) |
| POPCz    | 412             | 4.43          | 3.78               | 18.98         | 96.22              | -               | -                  | -             | -                  |
|          | 432             | 6.40          | 5.82               | 19.32         | 94.18              | -               | -                  | -             | -                  |
|          | 553             | -             | -                  | -             | -                  | 94.99           | 38.12              | 624.90        | 61.88              |
|          | 600             | -             | -                  | -             | -                  | 64.31           | 41.74              | 665.42        | 58.26              |
| PSPCz    | 411             | 4.52          | 12.26              | 15.11         | 87.74              | -               | -                  | -             | -                  |
|          | 431             | 4.02          | 10.74              | 14.90         | 89.26              | -               | -                  | -             | -                  |
|          | 552             | -             | -                  | -             | -                  | 121.82          | 3.10               | 773.70        | 96.90              |
|          | 596             | -             | -                  | -             | -                  | 82.69           | 3.32               | 753.17        | 96.68              |
|          | 650             | -             | -                  | -             | -                  | 33.33           | 2.56               | 733.36        | 97.44              |
| PSePCz   | 411             | 5.37          | 100                | -             | -                  | -               | -                  | -             | -                  |
|          | 432             | 5.43          | 100                | -             | -                  | -               | -                  | -             | -                  |
|          | 553             | -             | -                  | -             | -                  | 173.56          | 25.92              | 456.67        | 74.08              |
|          | 602             | -             | -                  | -             | -                  | 131.71          | 22.44              | 394.18        | 77.56              |
|          | 664             | -             | -                  | -             | -                  | 120.13          | 18.73              | 357.05        | 81.27              |
| PTePCz   | 415             | 3.06          | 33.27              | 12.61         | 66.73              | -               | -                  | -             | -                  |
|          | 441             | 4.02          | 43.22              | 12.96         | 56.78              | -               | -                  | -             | -                  |
|          | 466             | 4.12          | 46.91              | 12.37         | 53.09              | -               | -                  | -             | -                  |
|          | 555             | -             | -                  | -             | -                  | 0.78            | 35.11              | 9.90          | 64.89              |
|          | 604             | -             | -                  | -             | -                  | 0.13            | 16.46              | 5.21          | 83.54              |

Determined from the fitting function of  $I(t) = A_1 e^{-\frac{t}{\tau_1}} + A_2 e^{-\frac{t}{\tau_2}}$  according to the fluorescence and ultralong luminescence decay curves. We hypothesized that the double exponential

fittings of lifetimes were attributed to two kinds of molecular states (i.e., on a surface and inside of a crystal) of PEPCz crystals.

### 9. pRTP photographs of PEPCz in crystalline state

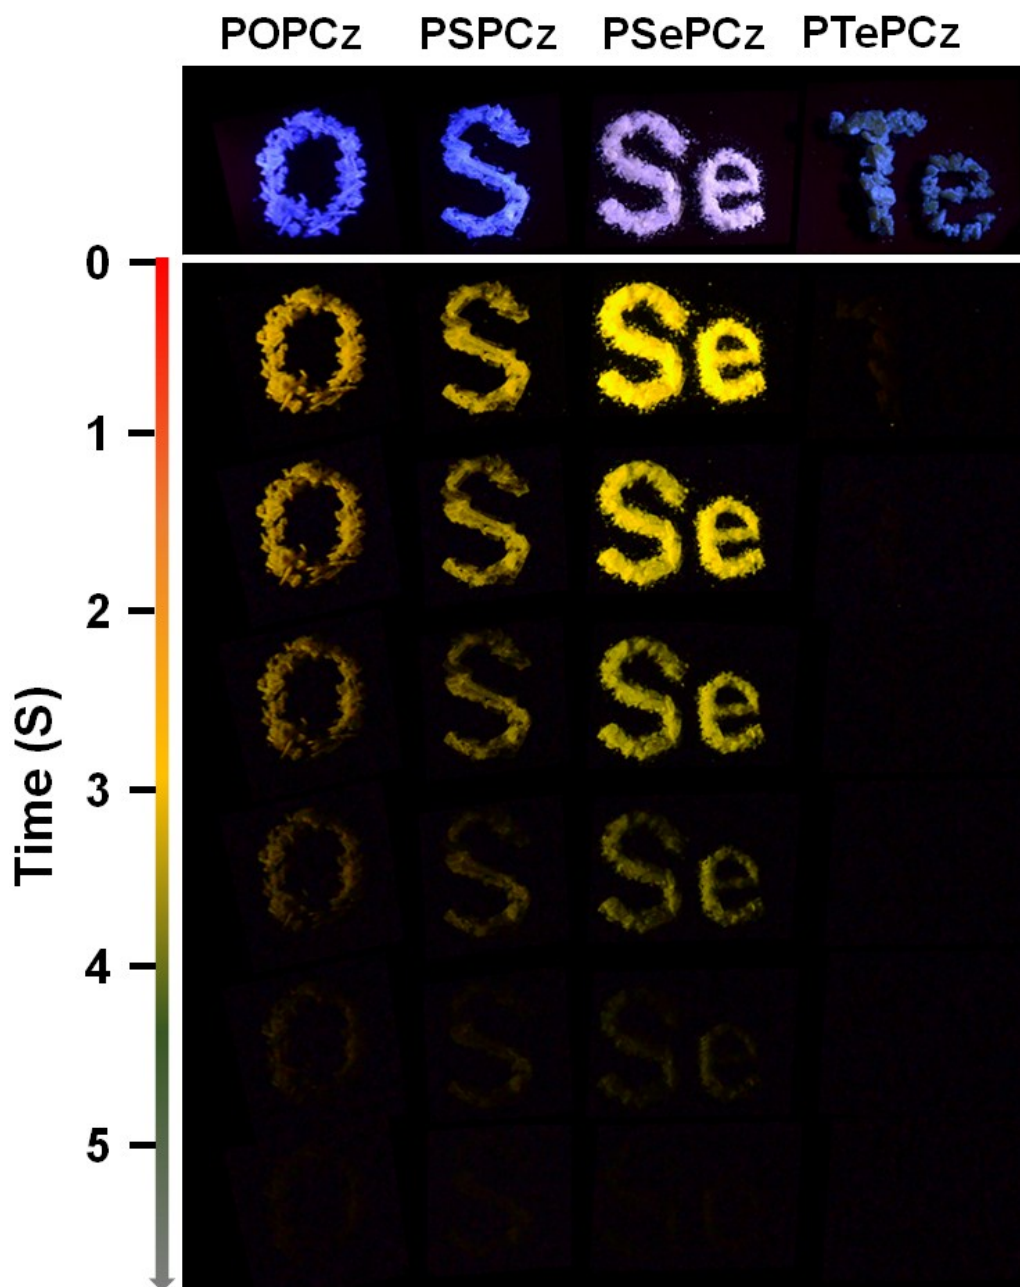

**Fig. S18** Photographs of the four pRTP PEPCz materials taken at different time intervals before (first row) and after (succeeding rows) turn-off of the excitation under ambient conditions.



## 10. Time-resolved excitation spectra and pRTP mapping of PSePCz in crystalline state

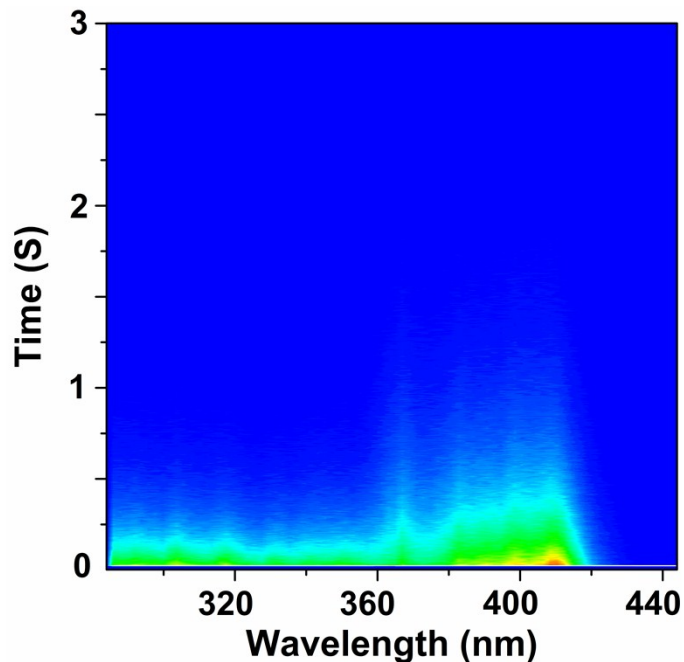

**Fig. S19** Time-resolved excitation spectra obtained at 298 K by monitoring the emission of PSePCz at 553 nm on varying the excitation wavelengths from 270 to 460 nm.

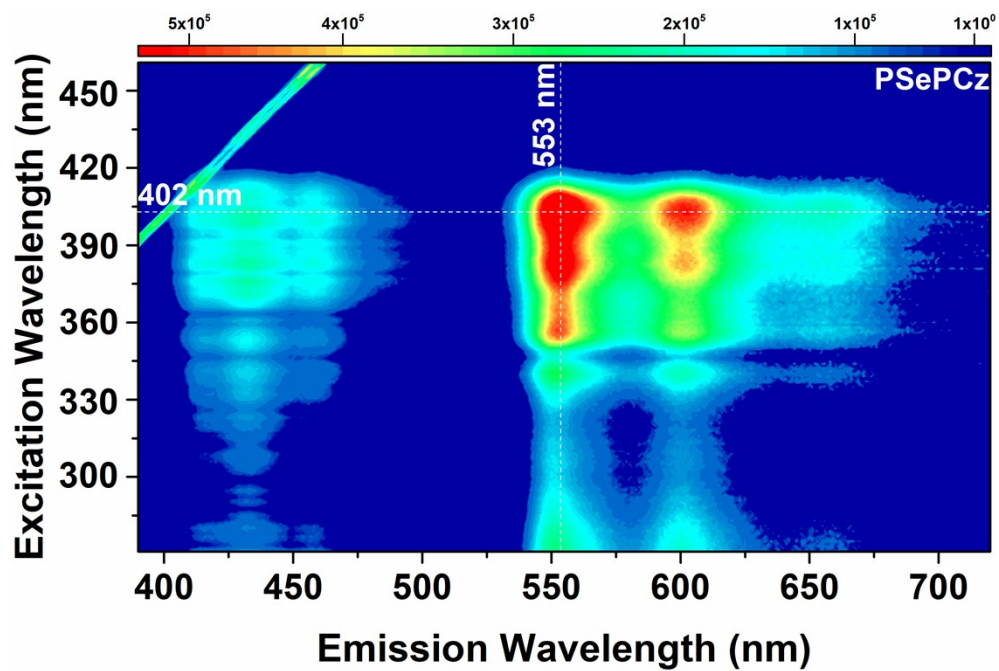

**Fig. S20** Excitation-phosphorescence mapping of PSePCz.

### 11. pRTP spectra under different excitation wavelength of PSePCz in crystalline state

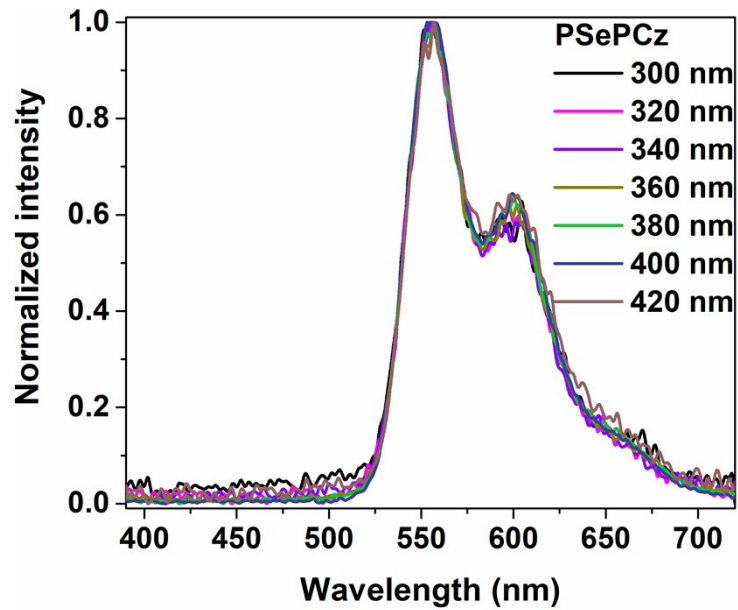

**Fig. S21** Phosphorescence spectra of PSePCz excited by different wavelength in the crystalline state.

The pRTP emission profiles of PSePCz were identical while excitation wavelength changed.

## 12. pRTP spectra of PEPCz in the air and argon

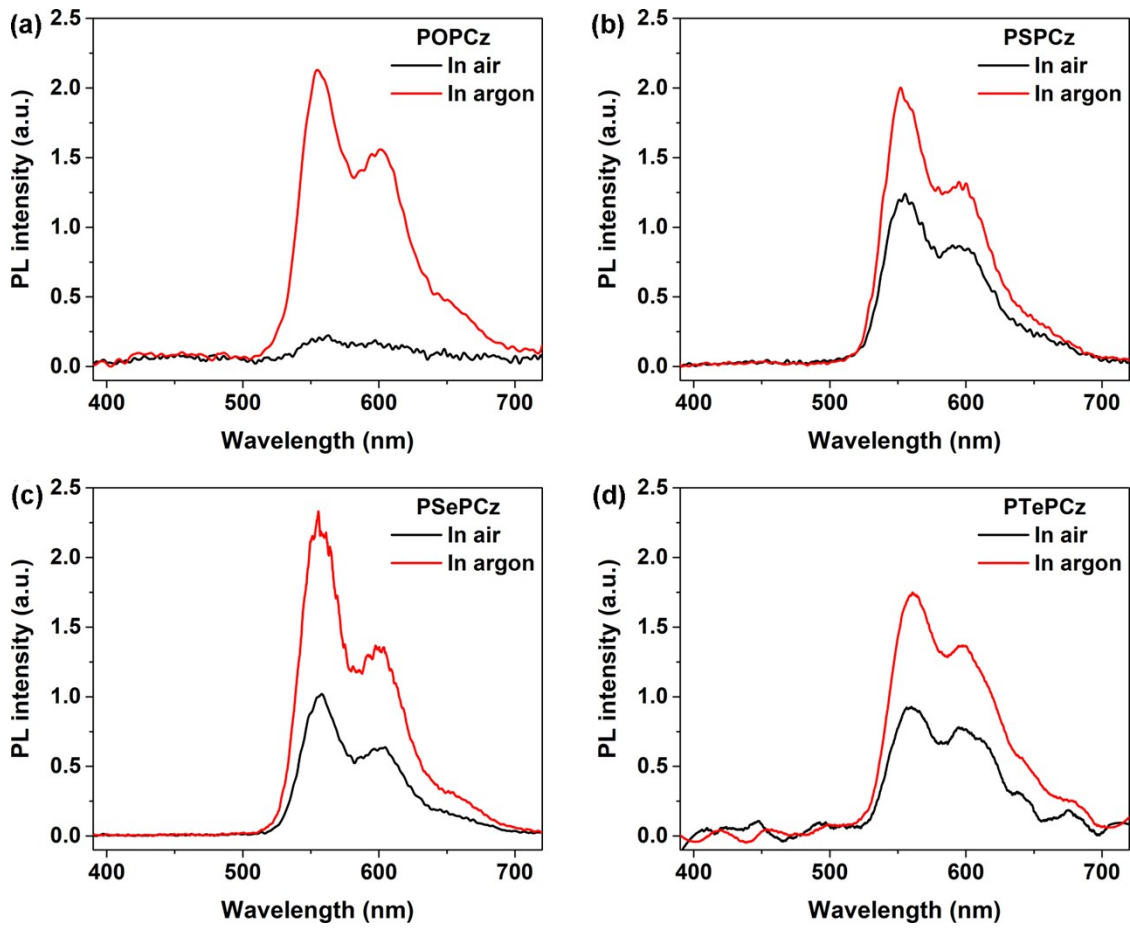

**Fig. S22** Phosphorescence spectra at room temperature of **PEPCz** in air and argon atmosphere respectively. Excitation wavelength: 365 nm.

### 13. Single-crystal X-ray structure determination

**X-ray Crystallography.** Crystals of appropriate quality for X-ray diffraction studies were selected a suitable crystal, attached to a glass fiber, and quickly placed in a glass vial. All data were collected using a Bruker APEX II CCD detector/D8 diffractometer using Mo/Cu  $K\alpha$  radiation. The data were corrected for absorption through Gaussian integration from indexing of the crystal faces. Structures were solved using the direct methods programs SHELXS-97, and refinements were completed using the program SHELXL-97.

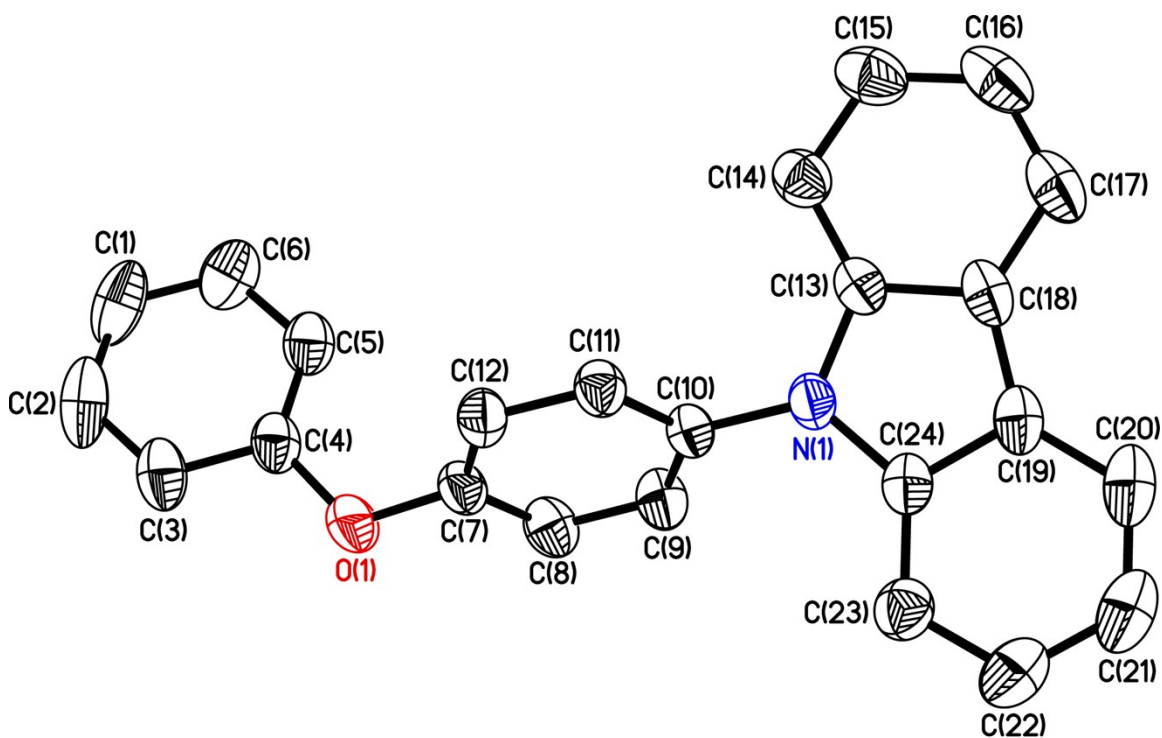

**Fig. S23** Molecular Structure of **POPCz** with thermal ellipsoids presented at a 50% probability level. All hydrogen atoms have been omitted for clarity. Selected bond lengths (Å): N(1)-C(13), 1.3879(17); N(1)-C(24), 1.3945(18); N(1)-C(10), 1.4221(16); O(1)-C(4), 1.375(2); O(1)-C(7), 1.3875(17). Bond angles (deg): C(13)-N(1)-C(24), 108.53(11); C(13)-N(1)-C(10), 125.93(11); C(24)-N(1)-C(10), 125.34(11); C(4)-O(1)-C(7), 118.82(12); C(5)-C(4)-O(1), 123.08(14); C(3)-C(4)-O(1), 115.68(16).

**Table S3.** Crystallographic experimental details for compound **POPCz**.

|                                   |                                                                                                                |
|-----------------------------------|----------------------------------------------------------------------------------------------------------------|
| Empirical formula                 | C <sub>24</sub> H <sub>17</sub> NO                                                                             |
| Formula weight                    | 335.38                                                                                                         |
| Temperature                       | 296(2) K                                                                                                       |
| Wavelength                        | 1.54178 Å                                                                                                      |
| Crystal system, space group       | Monoclinic, P2 (1) / n                                                                                         |
| Unit cell dimensions              | a = 16.0364(4) Å    α = 90 deg.<br>b = 7.5753(2) Å    β = 117.2140(10) deg.<br>c = 16.7540(4) Å    γ = 90 deg. |
| Volume                            | 1809.99(8) Å <sup>3</sup>                                                                                      |
| Z, Calculated density             | 4, 1.231 Mg/m <sup>3</sup>                                                                                     |
| Absorption coefficient            | 0.585 mm <sup>-1</sup>                                                                                         |
| F(000)                            | 704                                                                                                            |
| Crystal size                      | ? x ? x ? mm                                                                                                   |
| Theta range for data collection   | 3.161 to 63.785 deg.                                                                                           |
| Limiting indices                  | -18<=h<=17, -8<=k<=8, -19<=l<=18                                                                               |
| Reflections collected / unique    | 7314 / 2941 [R(int) = 0.0266]                                                                                  |
| Completeness to theta = 63.785    | 98.4 %                                                                                                         |
| Refinement method                 | Full-matrix least-squares on F <sup>2</sup>                                                                    |
| Data / restraints / parameters    | 2941 / 0 / 236                                                                                                 |
| Goodness-of-fit on F <sup>2</sup> | 1.662                                                                                                          |
| Final R indices [I>2sigma(I)]     | R1 = 0.0413, wR2 = 0.1621                                                                                      |
| R indices (all data)              | R1 = 0.0468, wR2 = 0.1737                                                                                      |
| Extinction coefficient            | 0.0074(13)                                                                                                     |
| Largest diff. peak and hole       | 0.200 and -0.197 e. Å <sup>-3</sup>                                                                            |
| CCDC number                       | 1831422                                                                                                        |

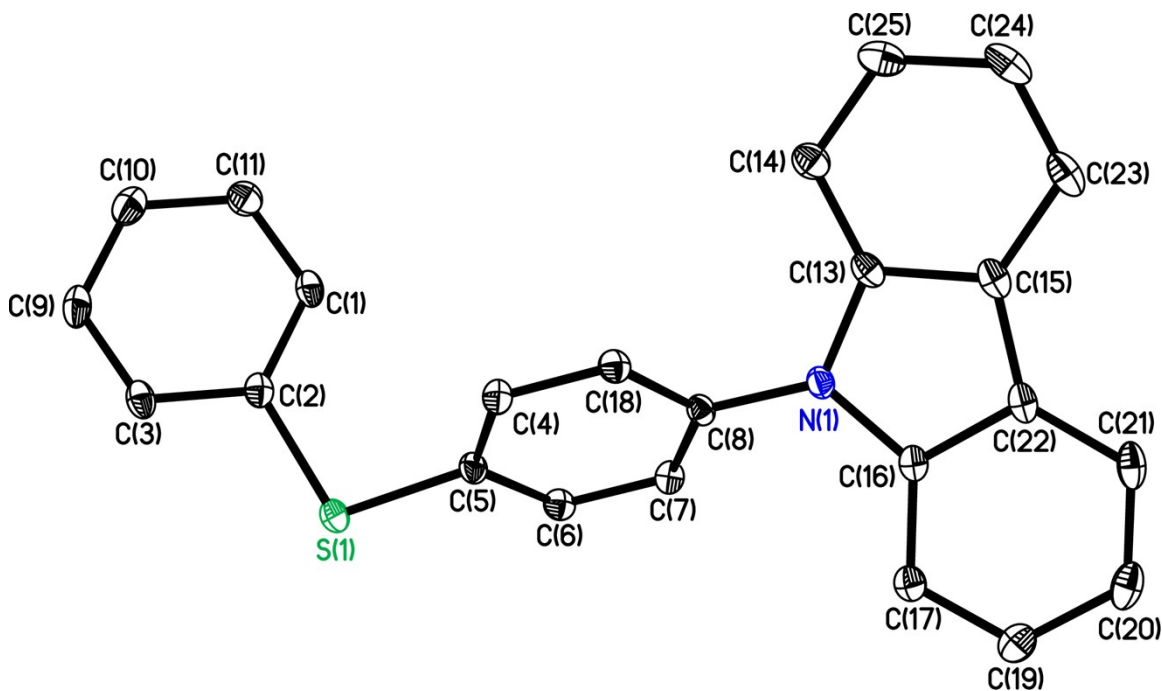

**Fig. S24** Molecular Structure of **PSpCz** with thermal ellipsoids presented at a 50% probability level. All hydrogen atoms have been omitted for clarity. Selected bond lengths (Å): N(1)-C(16), 1.3993(18); N(1)-C(13), 1.3995(18); N(1)-C(8), 1.4176(17); S(1)-C(2), 1.7702(15); S(1)-C(5), 1.7737(14). Bond angles (deg): C(16)-N(1)-C(13), 108.43(11); C(16)-N(1)-C(8), 125.46(11); C(13)-N(1)-C(8), 126.10(12); C(2)-S(1)-C(5), 103.82(7); C(1)-C(2)-S(1), 124.03(11); C(3)-C(2)-S(1), 116.33(11).

**Table S4.** Crystallographic experimental details for compound **PSPCz**.

|                                   |                                                                                                                |
|-----------------------------------|----------------------------------------------------------------------------------------------------------------|
| Empirical formula                 | C <sub>24</sub> H <sub>17</sub> NS                                                                             |
| Formula weight                    | 351.44                                                                                                         |
| Temperature                       | 153(2) K                                                                                                       |
| Wavelength                        | 0.71073 Å                                                                                                      |
| Crystal system, space group       | Monoclinic, P2 (1) / c                                                                                         |
| Unit cell dimensions              | a = 14.7755(6) Å    α = 90 deg.<br>b = 16.6199(6) Å    β = 100.0350(10) deg.<br>c = 7.5149(3) Å    γ = 90 deg. |
| Volume                            | 1817.18(12) Å <sup>3</sup>                                                                                     |
| Z, Calculated density             | 4, 1.285 Mg/m <sup>3</sup>                                                                                     |
| Absorption coefficient            | 0.185 mm <sup>-1</sup>                                                                                         |
| F(000)                            | 736                                                                                                            |
| Crystal size                      | ? x ? x ? mm                                                                                                   |
| Theta range for data collection   | 2.451 to 27.719 deg.                                                                                           |
| Limiting indices                  | -19<=h<=19, -21<=k<=21, -9<=l<=9                                                                               |
| Reflections collected / unique    | 62652 / 4171 [R(int) = 0.0492]                                                                                 |
| Completeness to theta = 25.242    | 99.8 %                                                                                                         |
| Refinement method                 | Full-matrix least-squares on F <sup>2</sup>                                                                    |
| Data / restraints / parameters    | 4171 / 0 / 235                                                                                                 |
| Goodness-of-fit on F <sup>2</sup> | 1.155                                                                                                          |
| Final R indices [I>2sigma(I)]     | R1 = 0.0384, wR2 = 0.0978                                                                                      |
| R indices (all data)              | R1 = 0.0513, wR2 = 0.1123                                                                                      |
| Extinction coefficient            | n/a                                                                                                            |
| Largest diff. peak and hole       | 0.473 and -0.569 e. Å <sup>-3</sup>                                                                            |
| CCDC number                       | 1831423                                                                                                        |

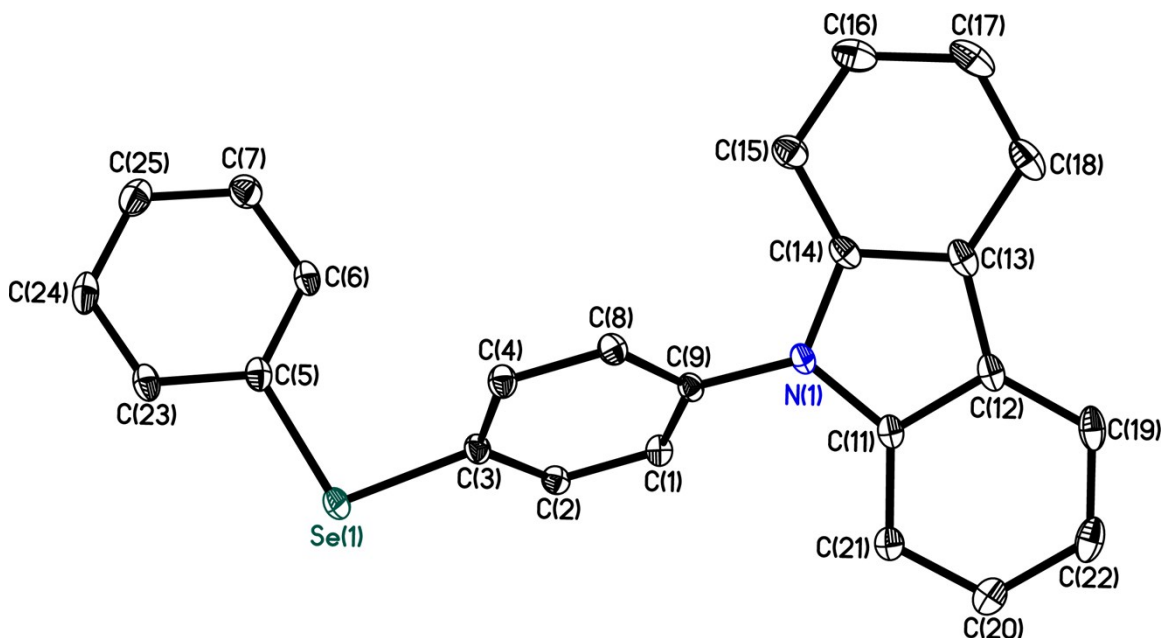

**Fig. S25** Molecular Structure of **PSePCz** with thermal ellipsoids presented at a 50% probability level. All hydrogen atoms have been omitted for clarity. Selected bond lengths (Å): N(1)-C(11), 1.395(2); N(1)-C(14), 1.399(2); N(1)-C(9), 1.4211(19); Se(1)-C(3), 1.9143(15); Se(1)-C(5), 1.9149(17). Bond angles (deg): C(11)-N(1)-C(14), 108.63(13); C(11)-N(1)-C(9), 125.42(13); C(14)-N(1)-C(9), 125.94(13); C(3)-Se(1)-C(5), 101.09(7); C(2)-C(3)-Se(1), 118.39(11); C(4)-C(3)-Se(1), 121.46(12).



**Table S5.** Crystallographic experimental details for compound **PSePCz**.

|                                   |                                             |                      |
|-----------------------------------|---------------------------------------------|----------------------|
| Empirical formula                 | C <sub>24</sub> H <sub>17</sub> NSe         |                      |
| Formula weight                    | 398.34                                      |                      |
| Temperature                       | 153(2) K                                    |                      |
| Wavelength                        | 0.71073 (Å)                                 |                      |
| Crystal system, space group       | Monoclinic, P2(1)/c                         |                      |
| Unit cell dimensions              | a = 14.9778(5) Å                            | α = 90 deg.          |
|                                   | b = 16.6273(6) Å                            | β = 99.6790(10) deg. |
|                                   | c = 7.5305(2) Å                             | γ = 90 deg.          |
| Volume                            | 1848.70(10) Å <sup>3</sup>                  |                      |
| Z, Calculated density             | 4, 1.431 Mg/m <sup>3</sup>                  |                      |
| Absorption coefficient            | 2.037 mm <sup>-1</sup>                      |                      |
| F(000)                            | 808                                         |                      |
| Crystal size                      | ? x ? x ? mm                                |                      |
| Theta range for data collection   | 2.450 to 27.556 deg.                        |                      |
| Limiting indices                  | -19<=h<=19, -21<=k<=21, -9<=l<=9            |                      |
| Reflections collected / unique    | 60339 / 4254 [R(int) = 0.0380]              |                      |
| Completeness to theta = 25.242    | 99.70%                                      |                      |
| Refinement method                 | Full-matrix least-squares on F <sup>2</sup> |                      |
| Data / restraints / parameters    | 4254 / 0 / 235                              |                      |
| Goodness-of-fit on F <sup>2</sup> | 1.118                                       |                      |
| Final R indices [I>2σ(I)]         | R1 = 0.0259, wR2 = 0.0703                   |                      |
| R indices (all data)              | R1 = 0.0310, wR2 = 0.0729                   |                      |
| Extinction coefficient            | n/a                                         |                      |
| Largest diff. peak and hole       | 0.431 and -0.684 e. Å <sup>-3</sup>         |                      |
| CCDC number                       | 1831424                                     |                      |

#### 14. Intermolecular interactions of PEPCz (E = O, S, Se) in crystal

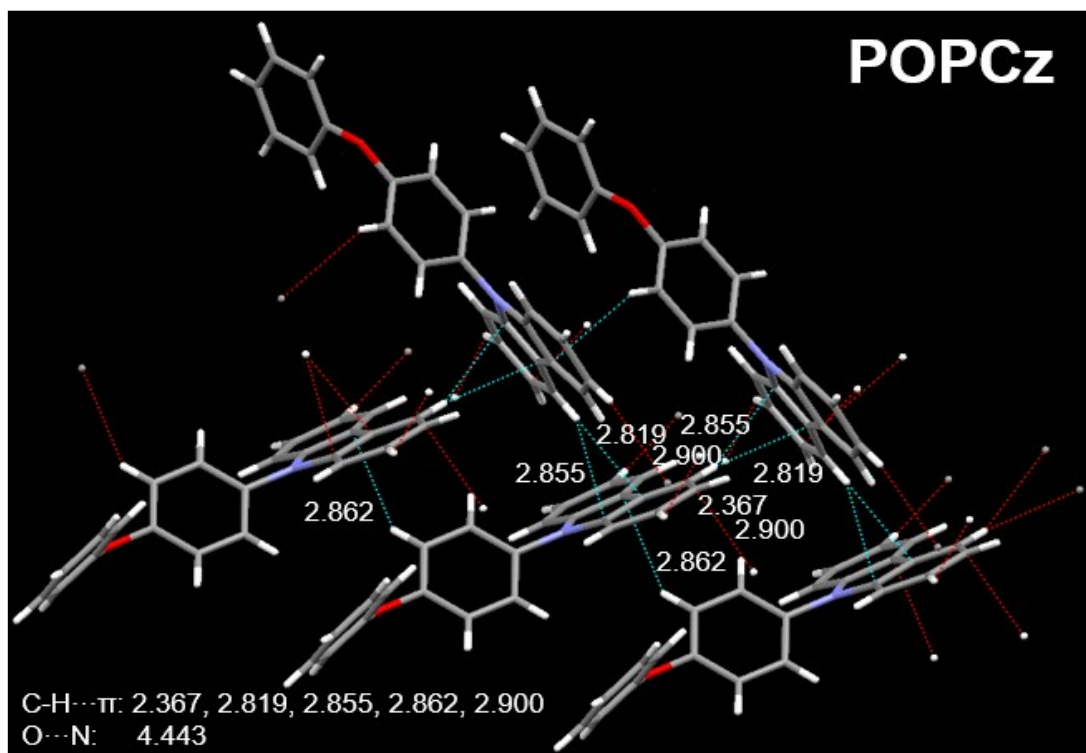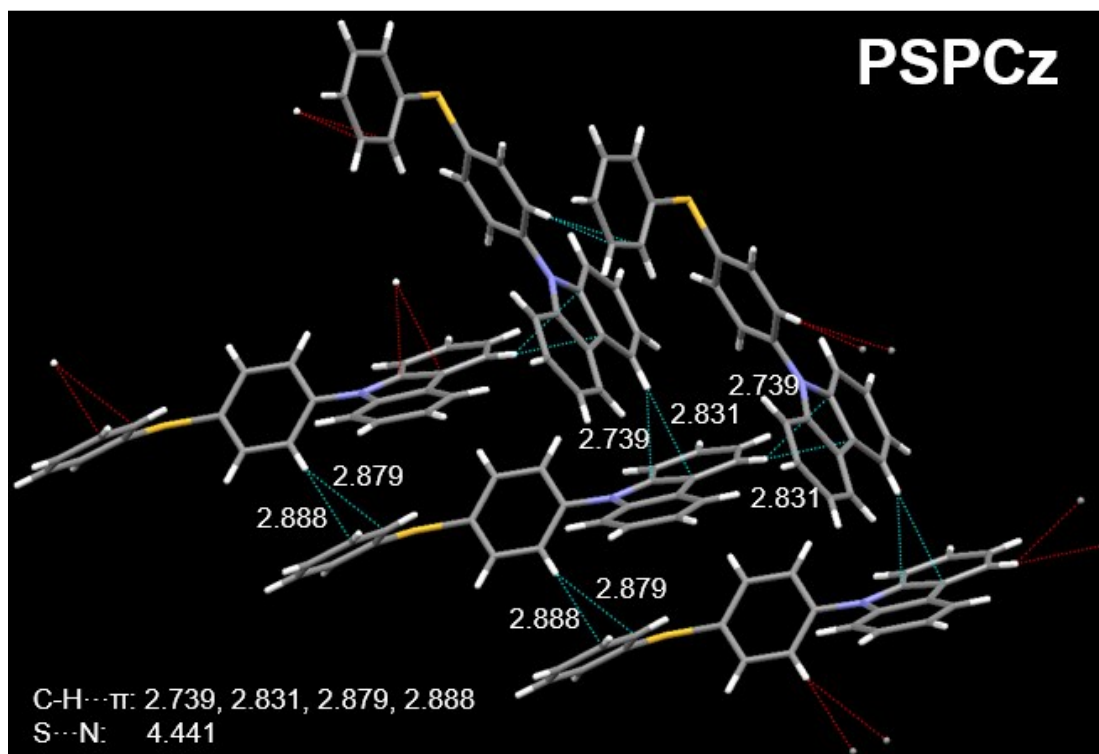

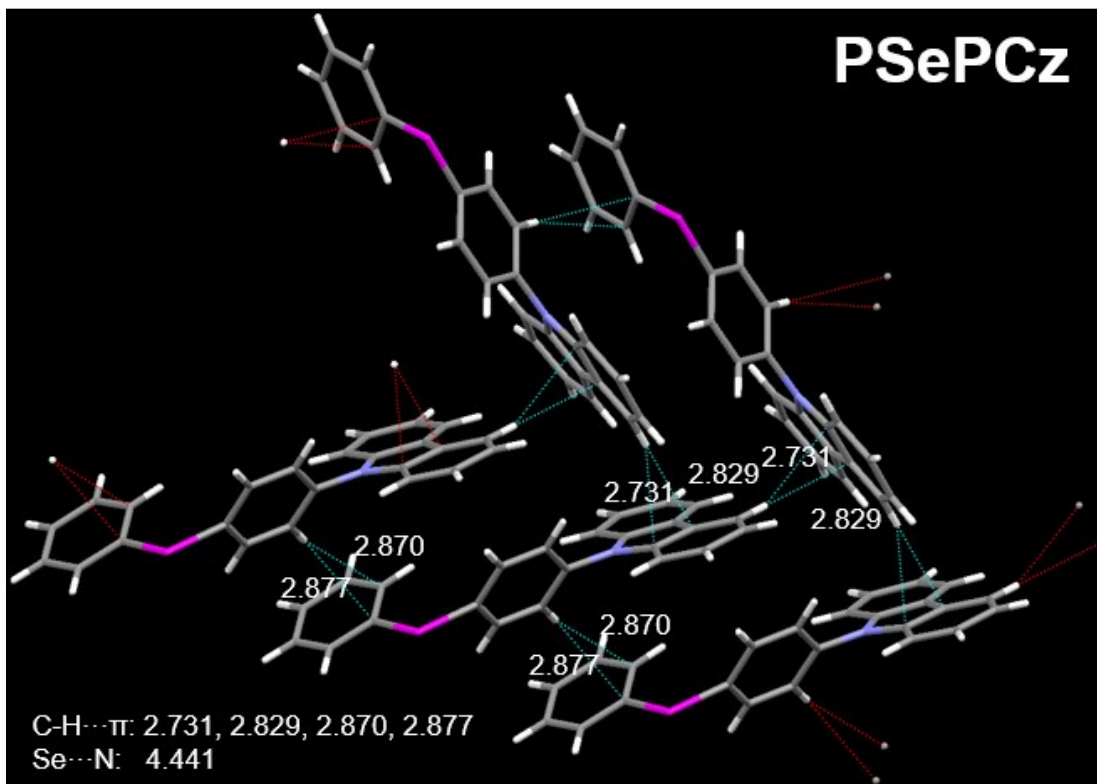

**Fig. S26** Single-crystal structure and molecular packing of **POPCz**, **PSPCz**, **PSePCz** with denoted intermolecular interactions. For **POPCz**, C-H...H-C (2.367 Å) and C-H... $\pi$  (2.900 Å) interactions were observed compared with **PSPCz** and **PSePCz**.

The crystal packing of **POPCz** indicated that the network was constructed by C-H...H-C and C-H... $\pi$  bonding interactions. In **PSPCz**, the intermolecular interaction C-H... $\pi$  was shorter than in **POPCz** and there were no C-H...H-C interactions observed. The C-H... $\pi$  contacts in **PSePCz** crystal network were slightly shorter than in **POPCz** and **PSPCz** (Fig. S26 and S27). These hydrogen bonds provide stabilizing energy for crystal packing and confine molecular geometry, thus, the molecular movement will be largely restricted in the photophysical process between the ground and excited states.

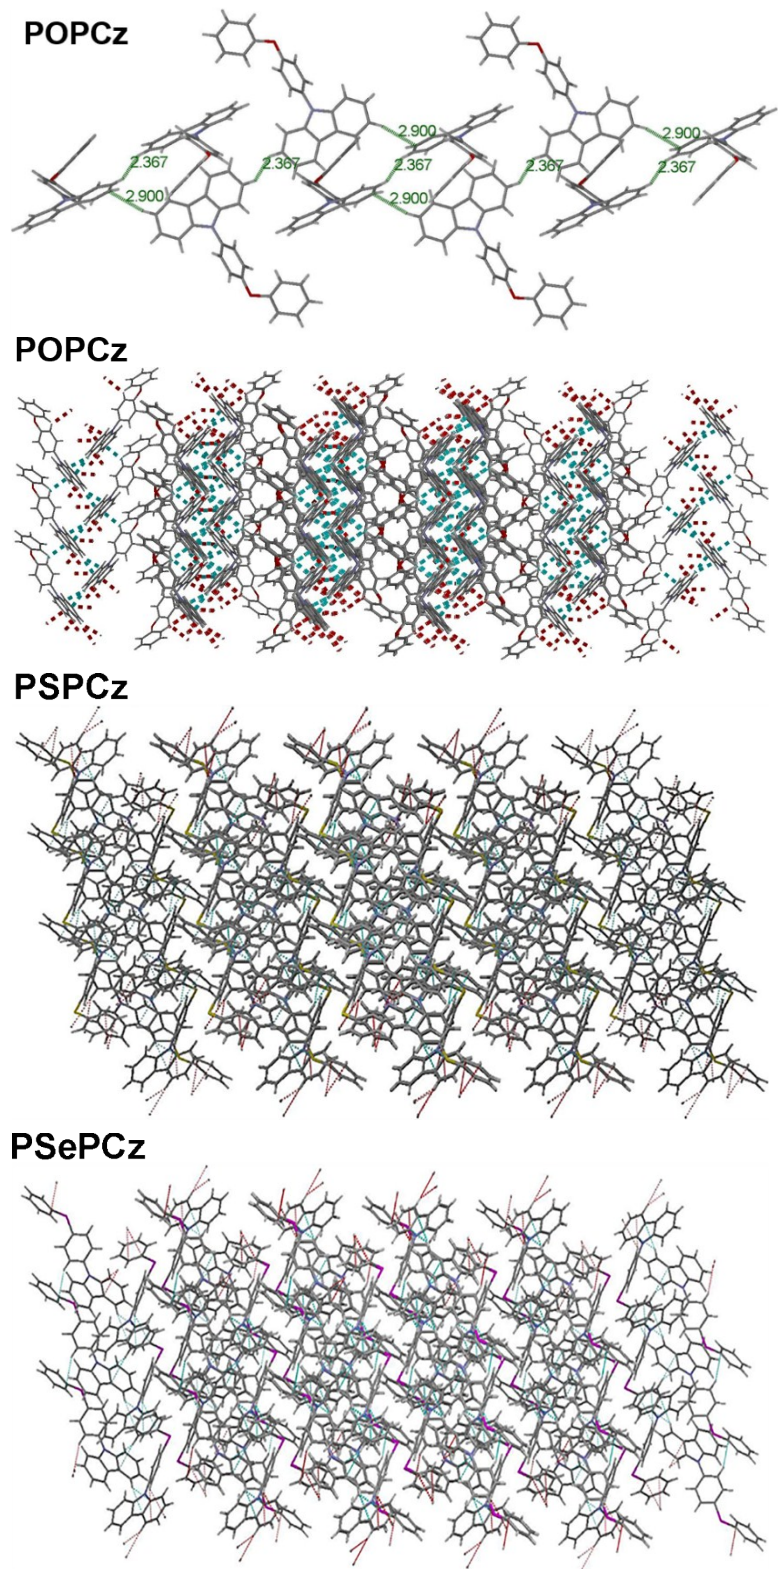

**Fig. S27** Similar molecular packing of **POPCz**, **PSPCz** and **PSePCz** in crystal.

15. The distances of the n and  $\pi$  groups of some pRTP molecules in literature

**Table S6.** The distances of intermolecular coupling of the n and  $\pi$  groups in two molecules that are adjacent in the single crystal of different compounds from literature references.

| Molecular formulas                                                                             | n and $\pi$ distances ( $\text{\AA}$ )                                                              |
|------------------------------------------------------------------------------------------------|-----------------------------------------------------------------------------------------------------|
| <b>(a)</b> 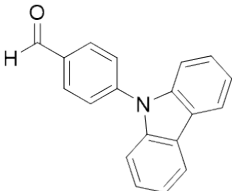   | <br>3.832         |
| <b>(b)</b>   | <br>3.768        |
| <b>(c)</b>  | <br>3.371       |
| <b>(d)</b>  | <br>3.330 3.536 |

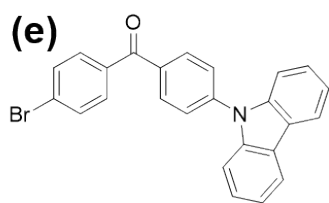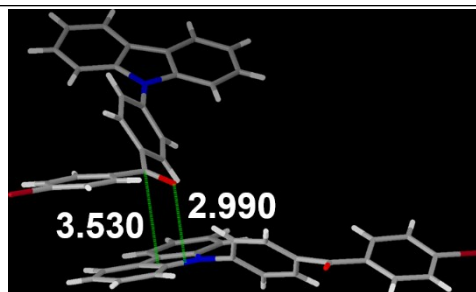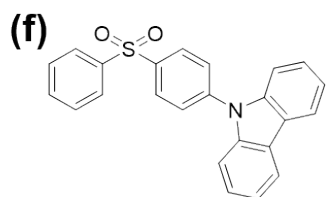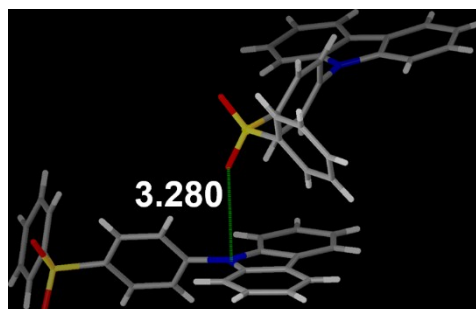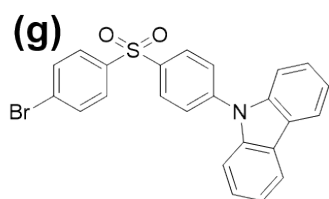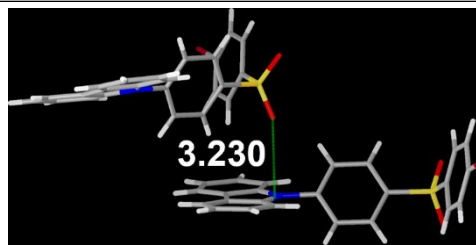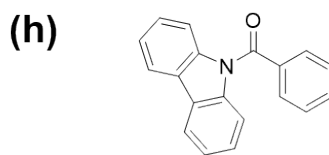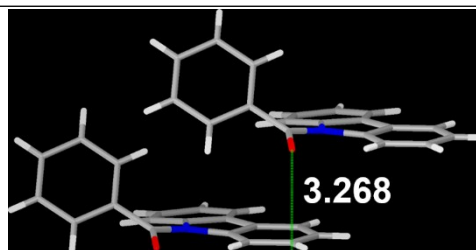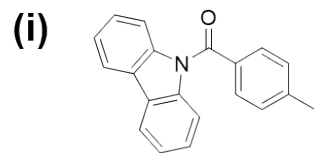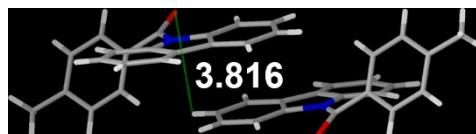

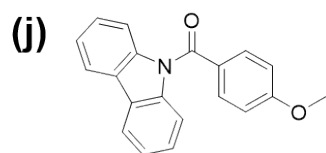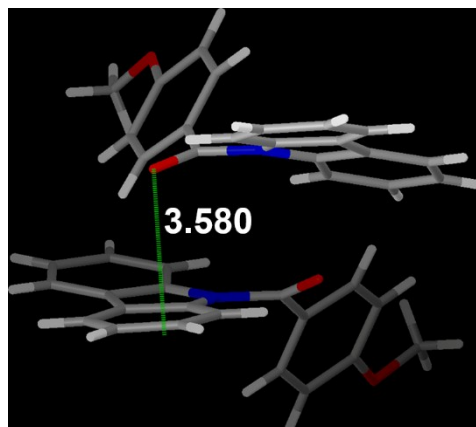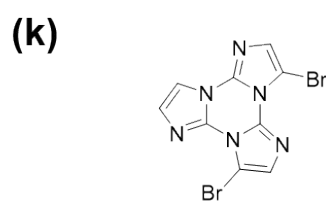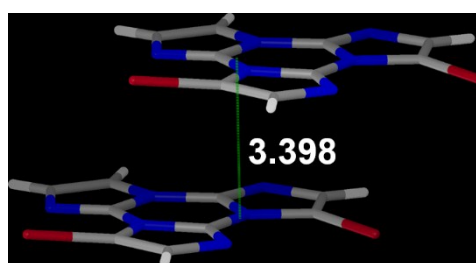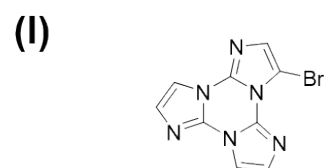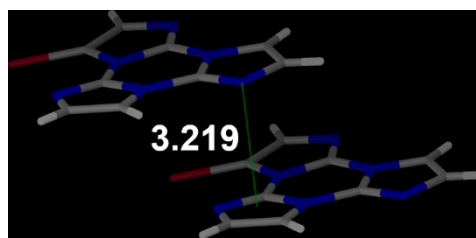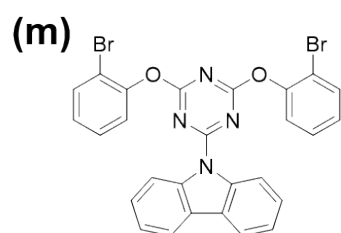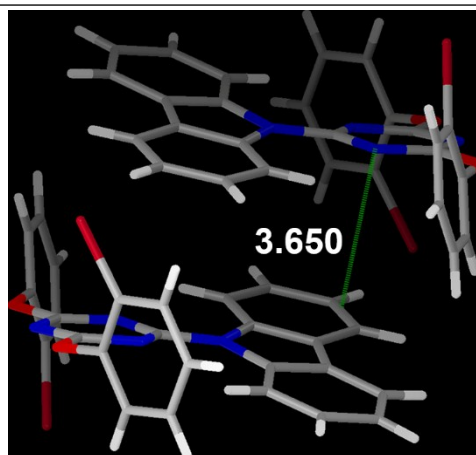

(n)

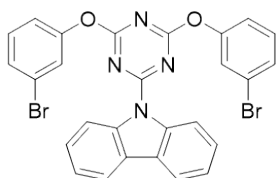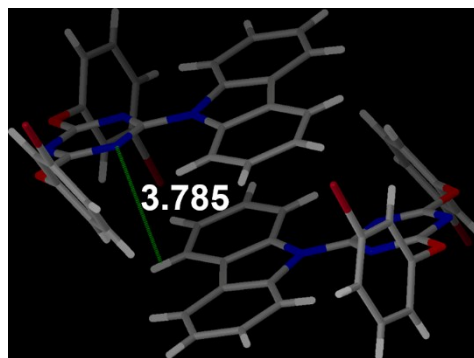

(o)

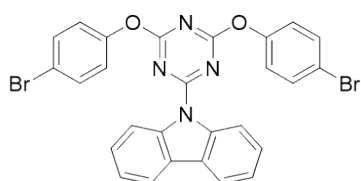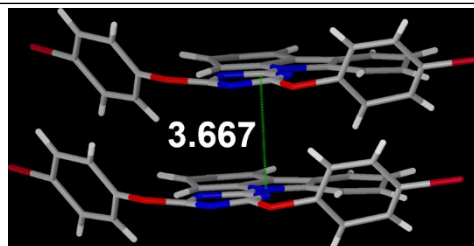

The distance from the n group to the coupled  $\pi$  plane of (a) CBA,<sup>4</sup> (b) 4,4'-di(*N*-carbazolyl) benzophenone,<sup>5</sup> (c) DPhCzT,<sup>6</sup> (d) Cz-BP, (e) BCz-BP, (f) Cz-DPS, (g) BCz-DPS,<sup>7</sup> (h) CPM, (i) CMPM, (j) CMOPM,<sup>8</sup> (k) 3,7-dibromotriimidazo[1,2-*a*:1',2'-*c*:1'',2''-*e*] [1,3,5] triazine, (l) 3-bromotriimidazo[1,2-*a*:1',2'-*c*:1'',2''-*e*] [1,3,5] triazine,<sup>9</sup> (m) o-BrTCz, (n) m-BrTCz, (o) p-BrTCz.<sup>10</sup>



## 16. Computational methods and results

The molecular geometries of ground states were obtained from the single crystal structures (**PEPCz**, E= O, S, Se) and optimized using the PBE0 functional (**PEPCz**, the structural optimization of **PTePCz** is based on the crystal structure of **POPCz**, **PSPCz** and **PSePCz**). A LANL08(d) basis set was employed for the Te atom and a 6-311G(d,p) basis set for the remaining atoms. The structures of all stationary points were fully optimized, and frequency calculations were performed at the same level. The frequency calculations confirmed the nature of all revealed equilibrium geometries: there were no imaginary frequencies. The vertical excitation energies and corresponding oscillator strengths of the first ten excited states of the n-th singlet ( $S_n$ ) and n-th triplet states ( $T_n$ ) were obtained on the corresponding ground state structure using the combination of TD-PBE0/6-311G\*\*(LANL08(d) for the Te atom).

The molecular geometries of  $T_1$  were optimized using the  $\Delta$ SCF approach. The nature transition orbitals (NTOs) were calculated for  $S_1$  and  $T_n$  states at optimized  $T_1$  geometric structure using the TD-DFT method. For simplicity and clarity purpose, we calculated the dominant contributions and the associated weights (>85%) for the triplet states. The results are calculated by Gaussian 09 package.<sup>11</sup> The Multiwfn package<sup>12,13</sup> is employed to calculate the components of n orbitals based on Mulliken population analysis (MPA). The spin-orbit coupling (SOC) matrix elements between singlet and involved triplet states are given by Beijing Density Function (BDF) program<sup>14,15</sup> using the cc-pVTZ-DK basis set. The calculated configuration proportion ( $\alpha_n$ ) of  $^3(n, \pi^*)$  states and SOC are shown in Figure S30.

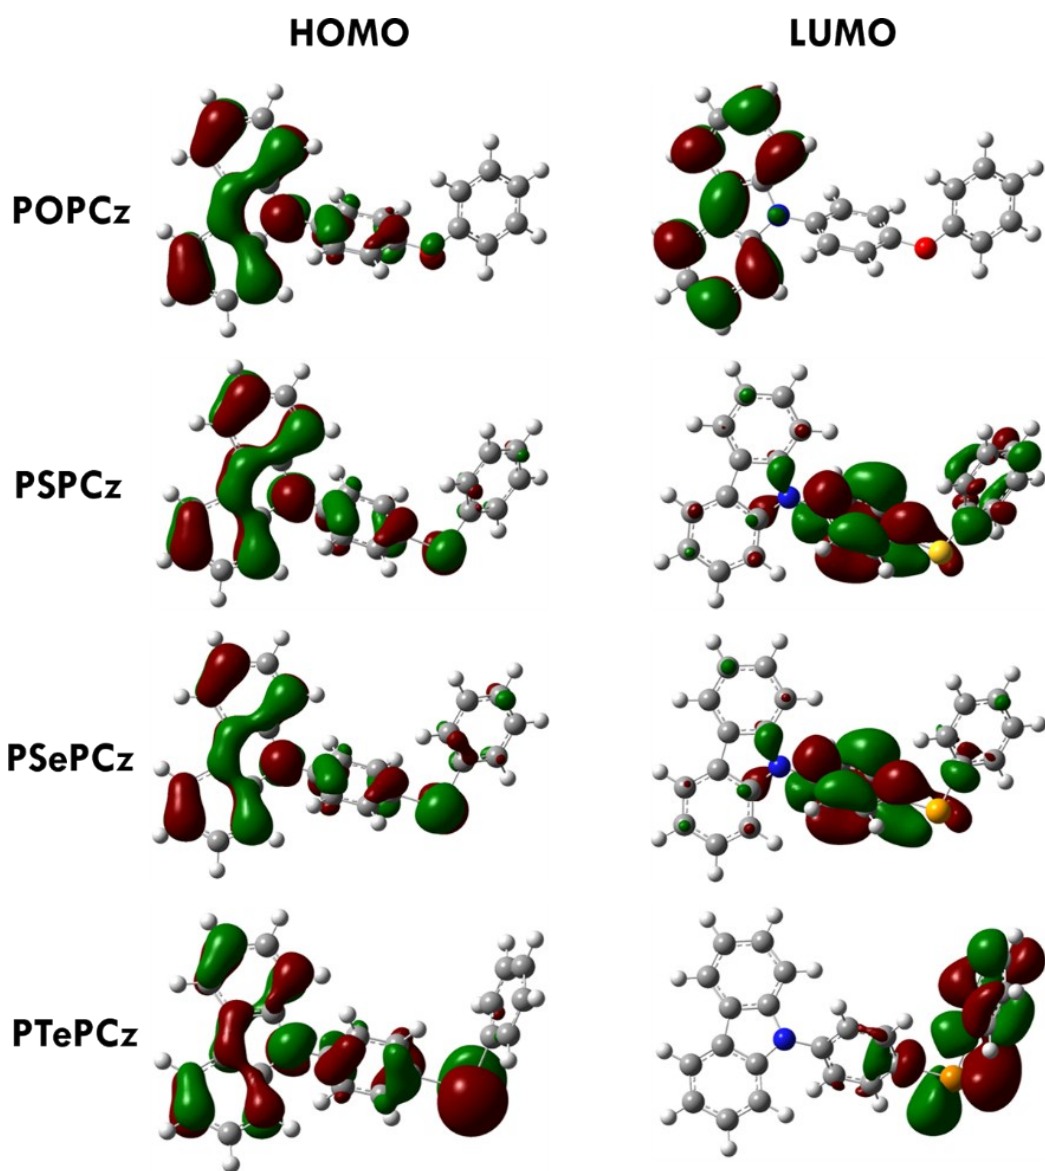

**Fig. S28** Electrical density contour of HOMO and LUMO of **PEPCz** in gas phase (contour level=0.02).

**Table S7.** The singlet and triplet excited states transition configurations of **PEPCz** revealed by TD-DFT calculations. The matched excited states that contain the same orbital transition components of  $S_1$  and  $T_1$  were highlighted in red. Note that H and L refer to highest occupied molecular orbital (HOMO) and lowest unoccupied molecular orbital (LUMO), respectively.

|        |       | Transition configuration (%)                                              |
|--------|-------|---------------------------------------------------------------------------|
| POPCz  | $S_1$ | H→L (89.60), H-1→L+5 (7.07)                                               |
|        | $T_1$ | H→L (91.40), H-2→L (2.67), H-3→L+5 (2.48)                                 |
| PSPCz  | $S_1$ | H→L (95.64)                                                               |
|        | $T_1$ | H→L (58.76), H-5→L (2.29), H-2→L (6.92), H-2→L+1 (3.30),<br>H→L+1 (15.2)  |
| PSePCz | $S_1$ | H→L (90.26), H-1→L (6.08)                                                 |
|        | $T_1$ | H→L (62.69), H-1→L (3.87), H-5→L (4.44), H-1→L+1 (3.75),<br>H→L+1 (13.88) |
| PTePCz | $S_1$ | H→L (64.66), H-1→L (31.06)                                                |
|        | $T_1$ | H→L (49.76), H-1→L (35.36), H-1→L+5 (3.03), H→L+2 (3.88)                  |

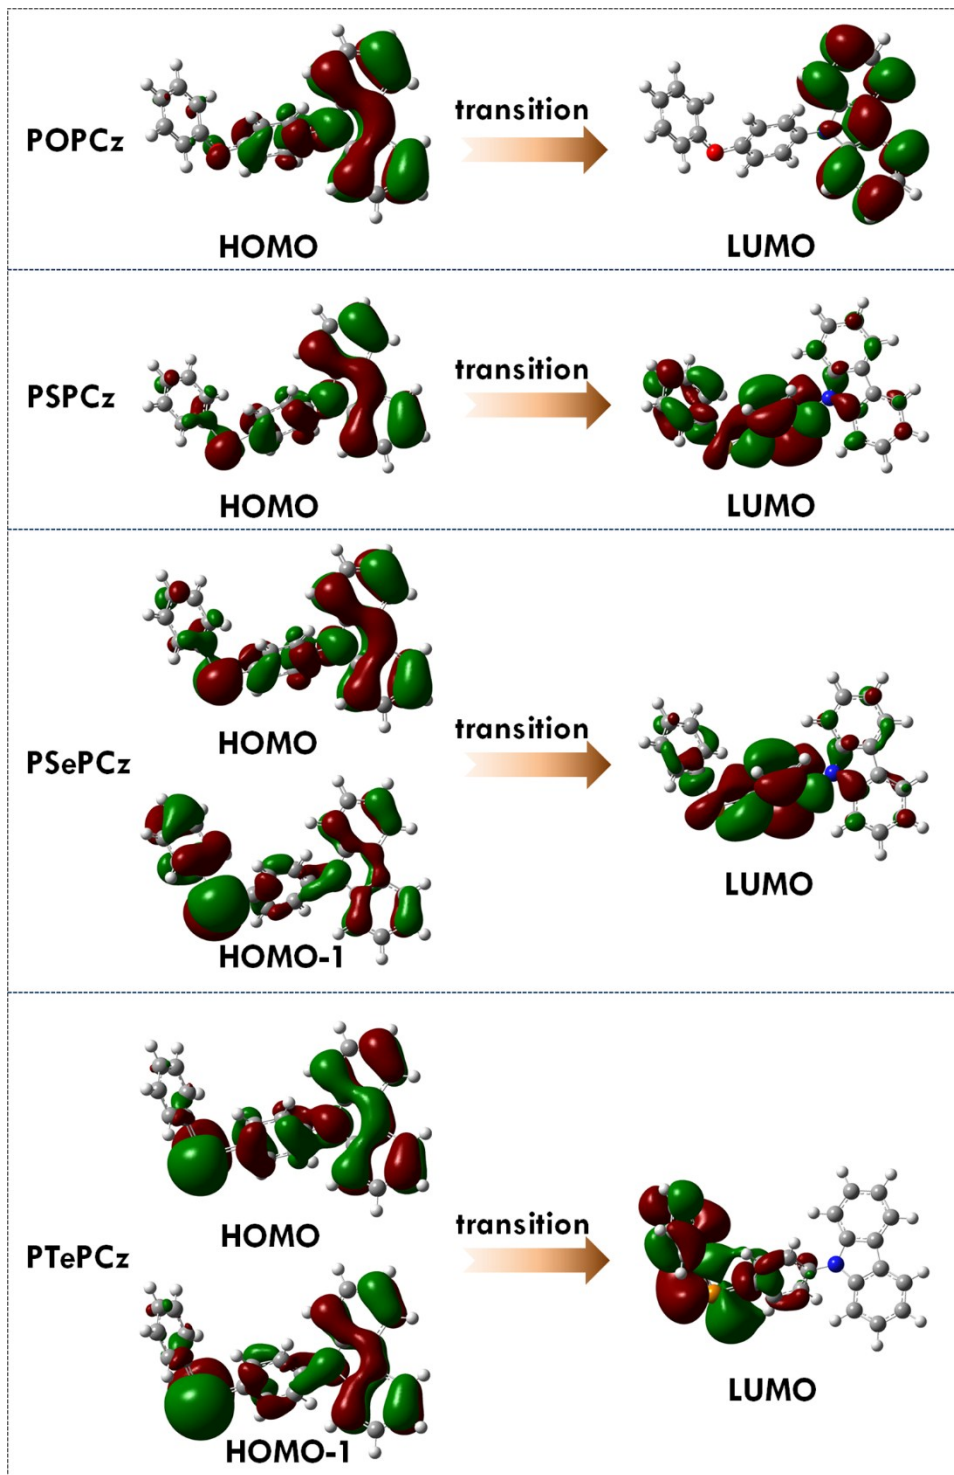

**Fig. S29** The isosurface and main orbitals of transition configurations of PEPCz at  $S_1$  and  $T_1$  states.

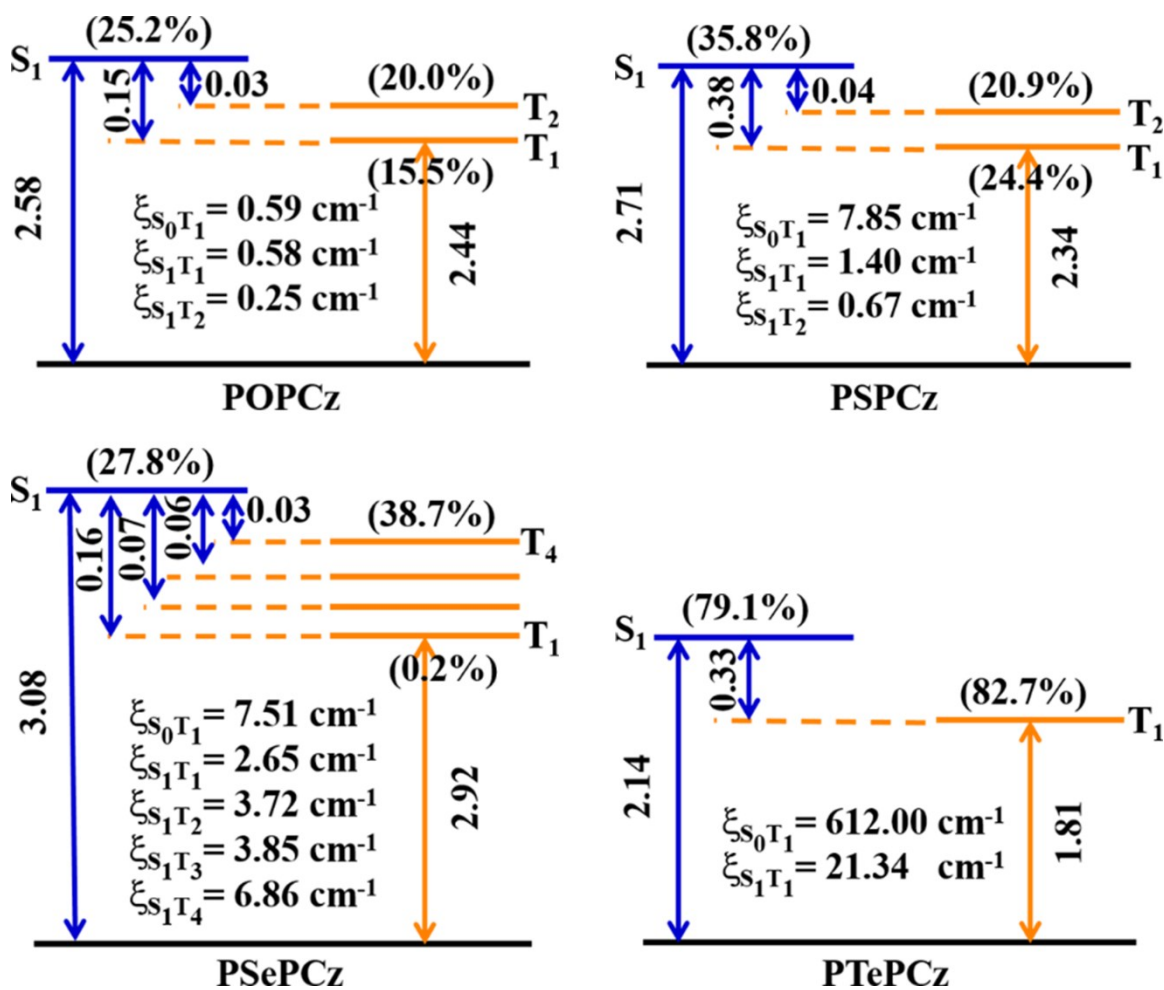

**Fig. S30** Calculated energy diagram,  $^3(n, \pi^*)$  configuration proportion ( $\alpha_n$ ) of  $S_1$  and  $T_n$ , spin-orbit coupling ( $\xi$ ) for the involved  $S_n$  and  $T_n$  states of **PEPCz**.

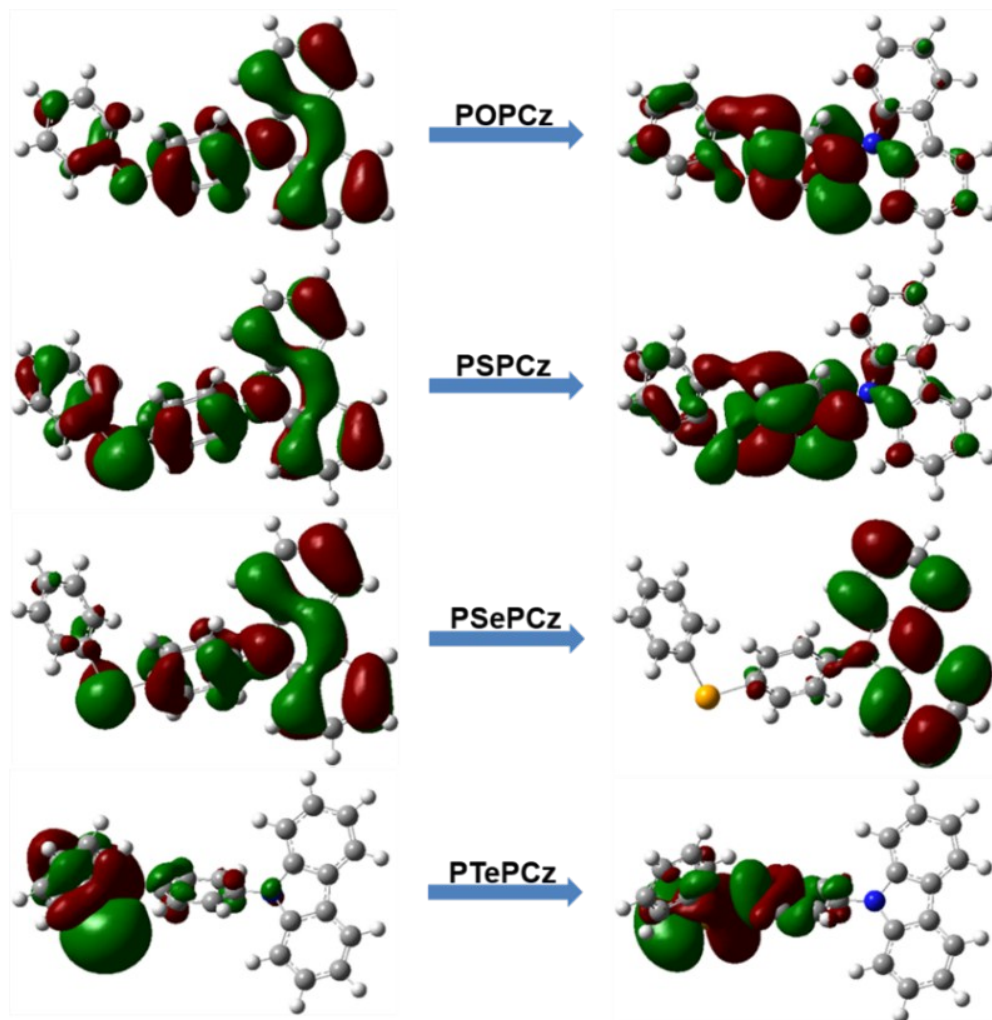

**Fig. S31** The NTOs of S<sub>1</sub> states at optimized T<sub>1</sub> geometric structure.

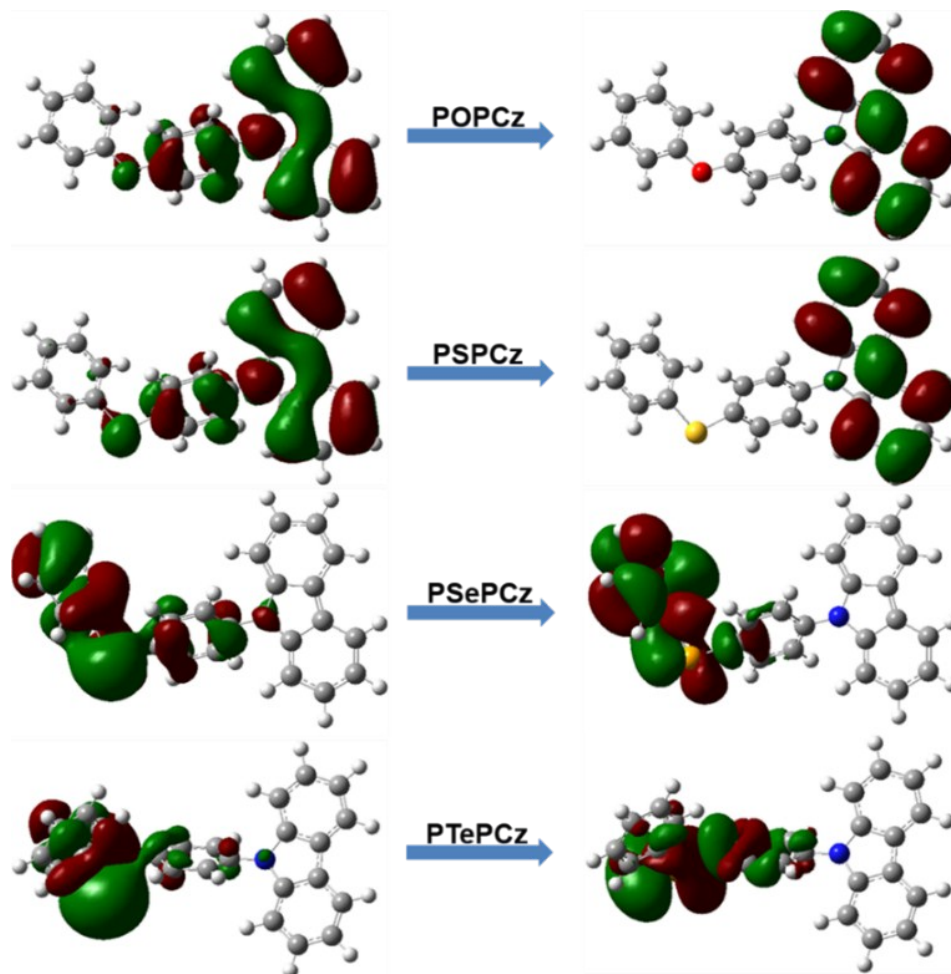

**Fig. S32** The NTOs of  $T_n$  states ( $n = 2$  for **POPCz** and **PSPCz**,  $n = 4$  for **PSePCz** and  $n = 1$  for **PTePCz**) at optimized  $T_1$  geometric structure.

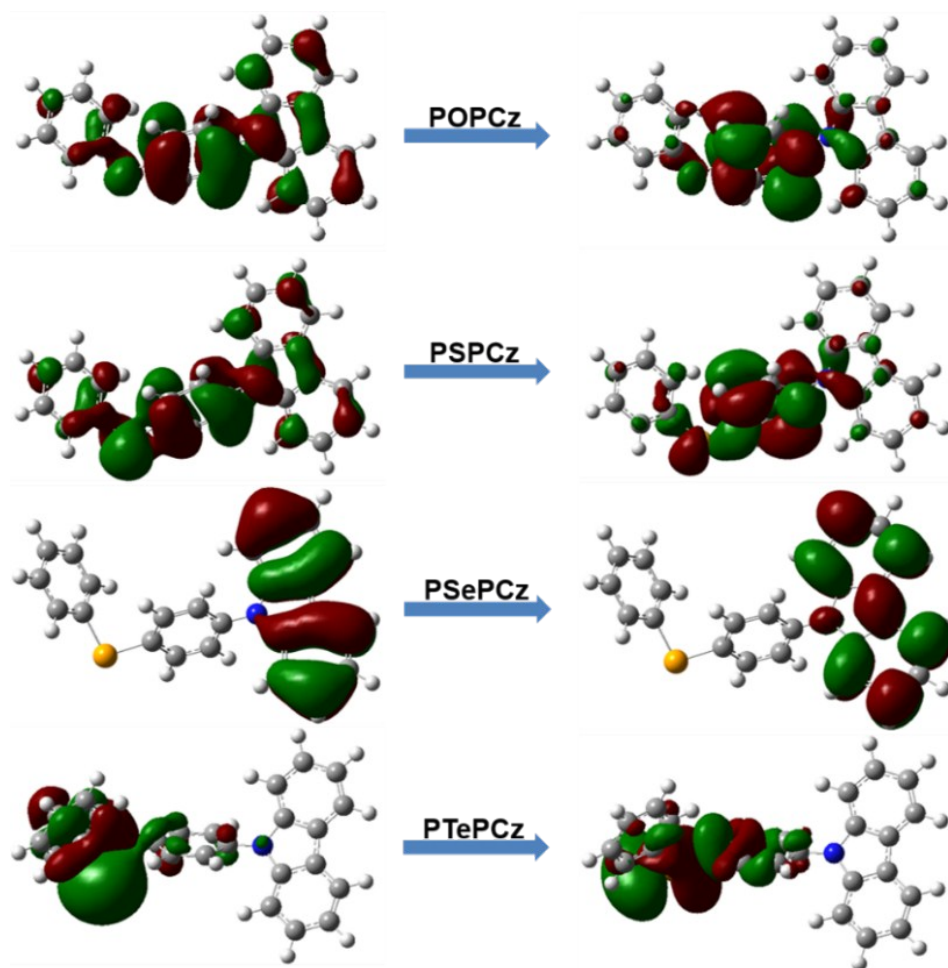

**Fig. S33** The NTOs of T<sub>1</sub> states at optimized T<sub>1</sub> geometric structure.



## 17. Color-encryption application

Based on **PEPCz** unique pRTP properties, the molecules could be used in security protection with color-decryption<sup>16,17</sup> and time-resolved<sup>7</sup> features. The pRTP of **PEPCz** were affected by the different factors. This process like the changing of Chinese “Taiji”. We combined organic materials and inorganic materials (rare earth materials) in “Taiji” simultaneously. As shown in Fig.5a, under 365 nm UV irradiation, the transient emission of the “taiji” were enormous differences while the blue **PSPCz** part (right), Pink **PSePCz** part (left), red  $\text{Eu}(1,10\text{-Phen})_2(\text{NO}_3)_3$  part (upper circle) and green  $\text{Tb}(\text{Salicylic Acid})_4(\text{NO}_3)_3$  (lower circle) were observed. The “taiji” pattern demonstrate the advantages of pRTP of **PSPCz** and **PSePCz**. These compounds could distinguish by naked eyes hardly under daylight. Once the excitation was removed, only the **PSPCz** and **PSePCz** crystalline sample (orange) of “taiji” could clearly observed. After 2s, there is only **PSePCz** could be seen in the pattern. The changed pattern was observed as a result of the intrinsic emission differences between PL and pRTP, and distinctive pRTP performances of different **PEPCz** molecules. The entire pathway is exhibiting color-encryption and time-resolved dual-responsive security protection.

18. SEM of PSePCz aggregates in 50% volume fractions of EtOH in water

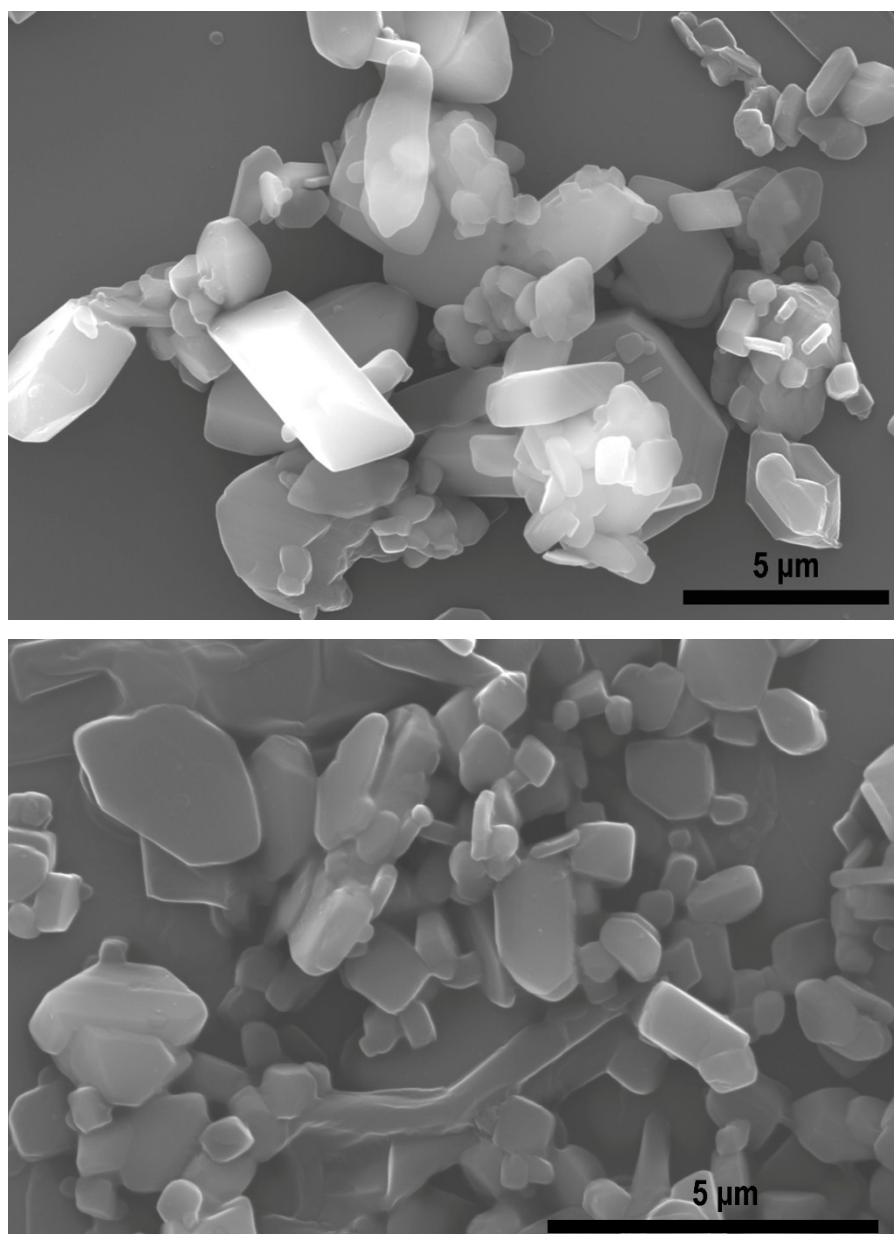

**Fig. S34** SEM images of PSePCz aggregates obtained from a suspension containing 50% volume fraction of EtOH in water.

## 19. The pRTP sensing application details

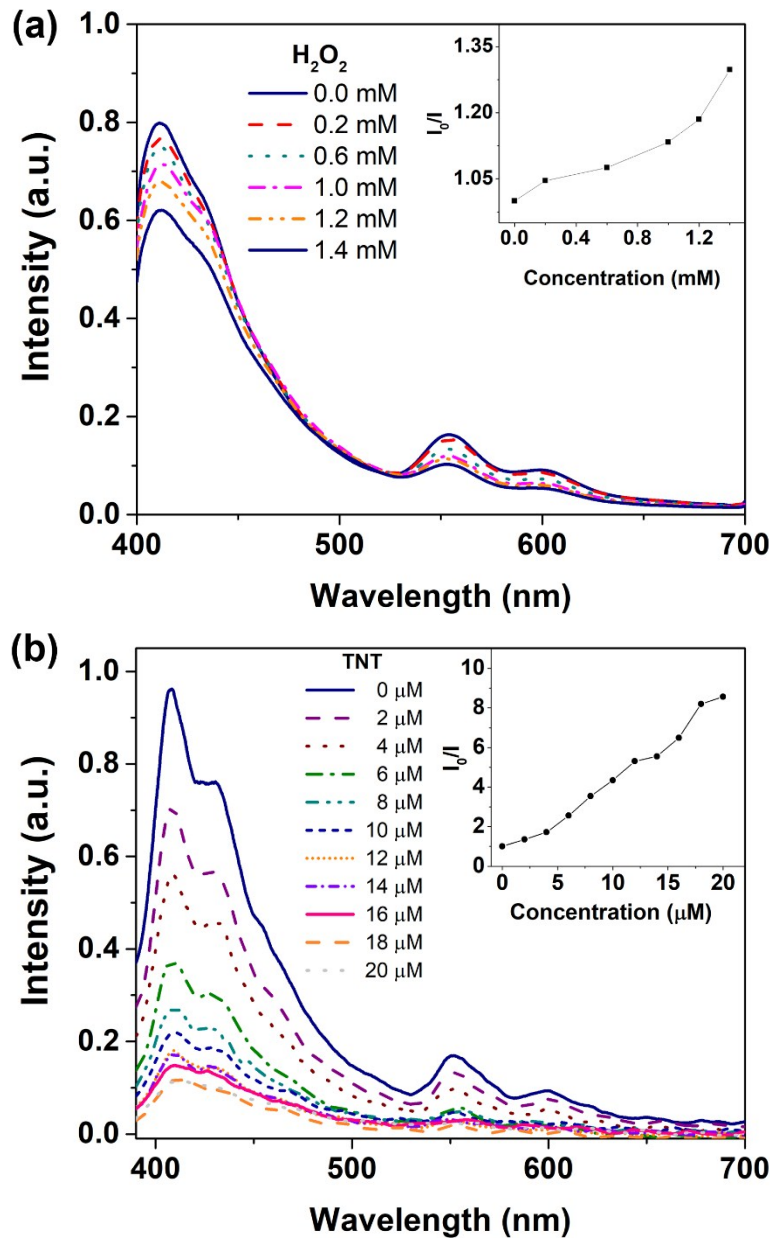

**Fig. S35** Fluorescent sensing for H<sub>2</sub>O<sub>2</sub> and TNT applications. (a) H<sub>2</sub>O<sub>2</sub> and (b) TNT concentration-dependent fluorescence spectra of PSePCz aggregates in H<sub>2</sub>O/EtOH (50/50 v/v) solution. Inset: Stern-Volmer plots: fluorescence for H<sub>2</sub>O<sub>2</sub> and TNT at different concentrations.

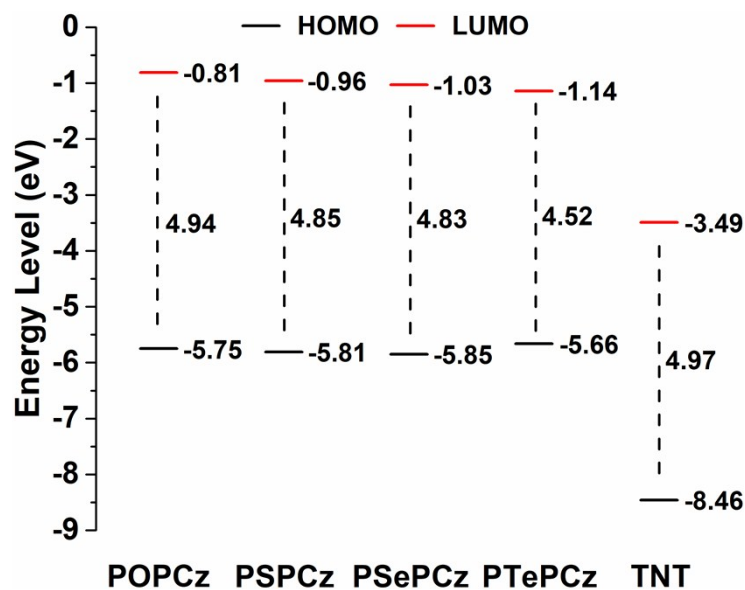

Fig. S36 Calculated orbital energy level of PEPCz and TNT.

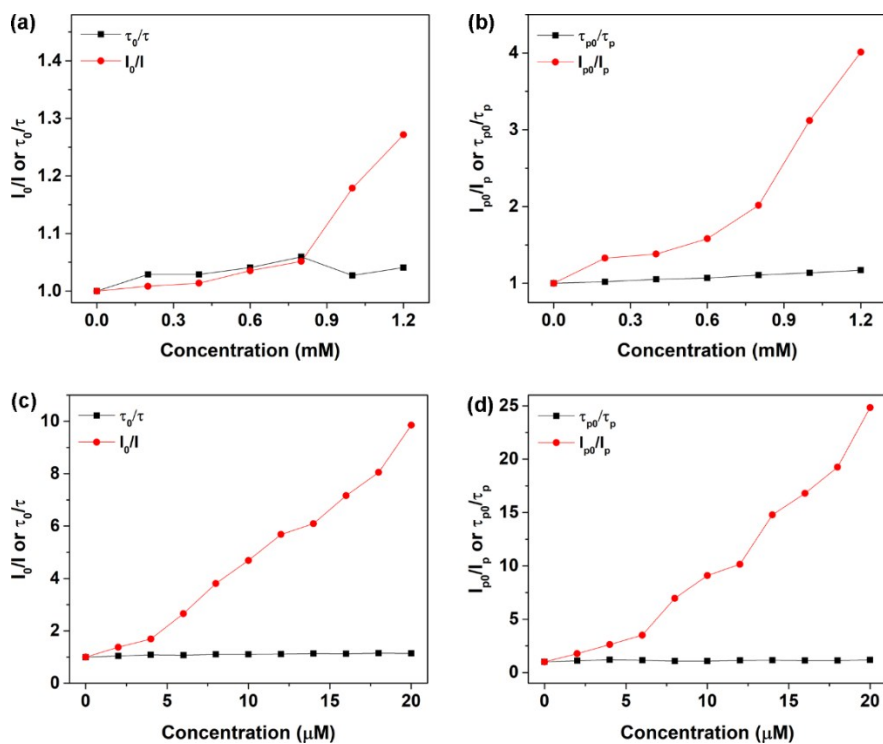

Fig. S37 For fluorescence, plots of the ratios of  $I_0/I$  and  $\tau_0/\tau$  of PSePCz aggregates against the concentration of (a)  $H_2O_2$  and (c) TNT, respectively. For phosphorescence, plots of the ratios of  $I_{p0}/I_p$  and  $\tau_{p0}/\tau_p$  of PSePCz aggregates against the concentration of (b)  $H_2O_2$  and (d) TNT, respectively.

20. The  $^1\text{H}$  and  $^{13}\text{C}$  NMR spectra of PEPCz in  $\text{CDCl}_3$

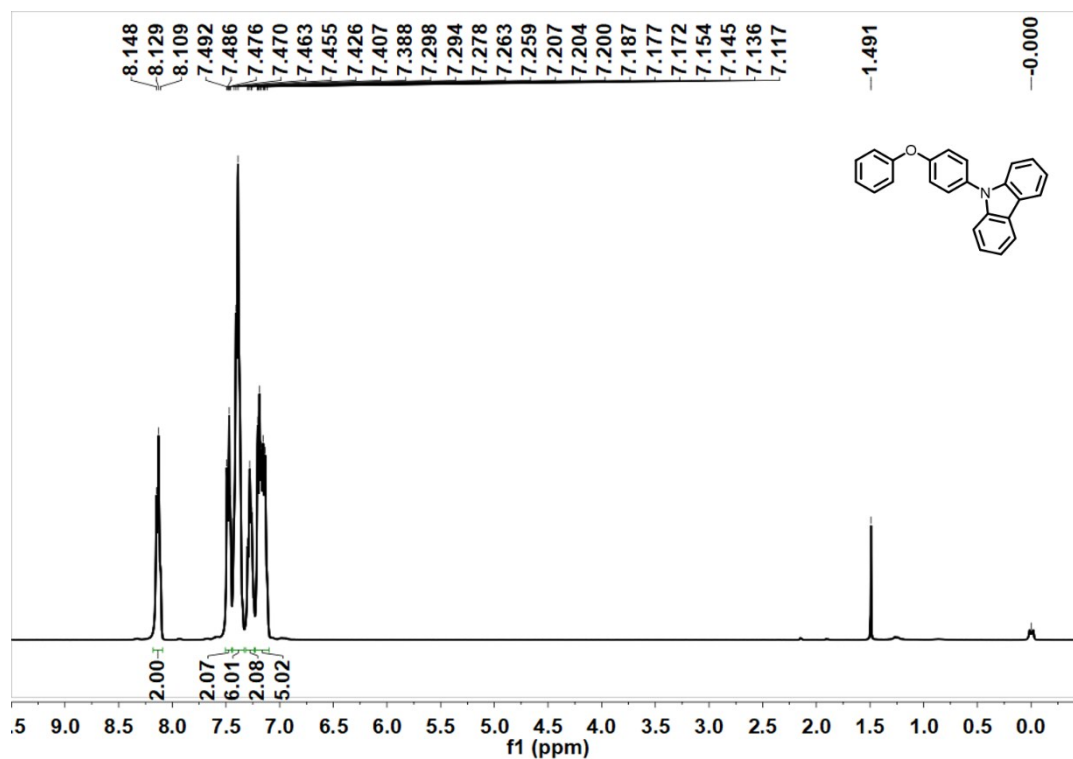

Fig. S38 The  $^1\text{H}$  NMR spectrum of **POPCz** in  $\text{CDCl}_3$ .

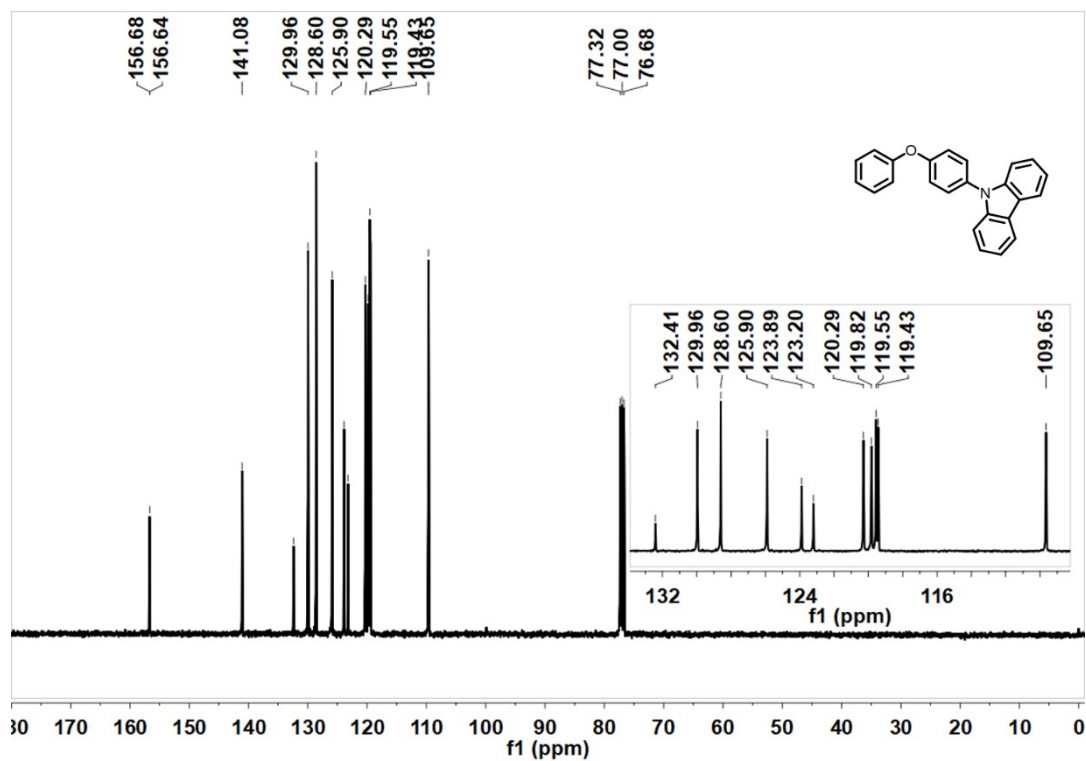

Fig. S39 The  $^{13}\text{C}$  NMR spectrum of **POPCz** in  $\text{CDCl}_3$ .

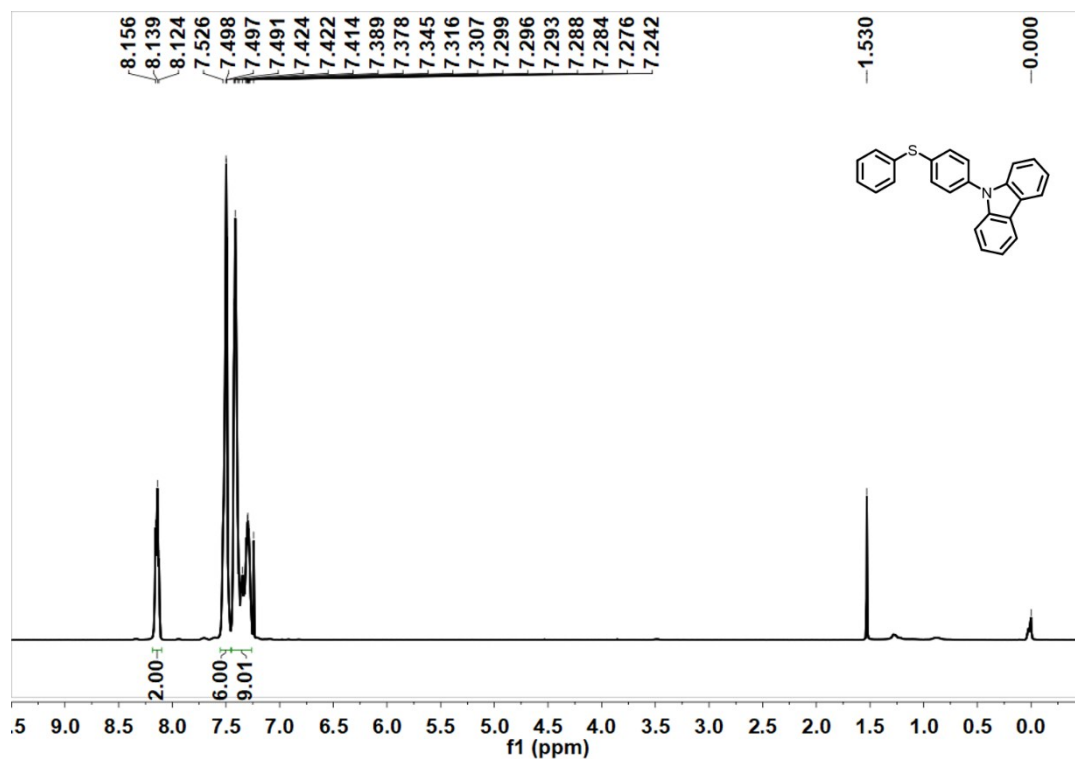

Fig. S40 The  $^1\text{H}$  NMR spectrum of PSpCz in  $\text{CDCl}_3$ .

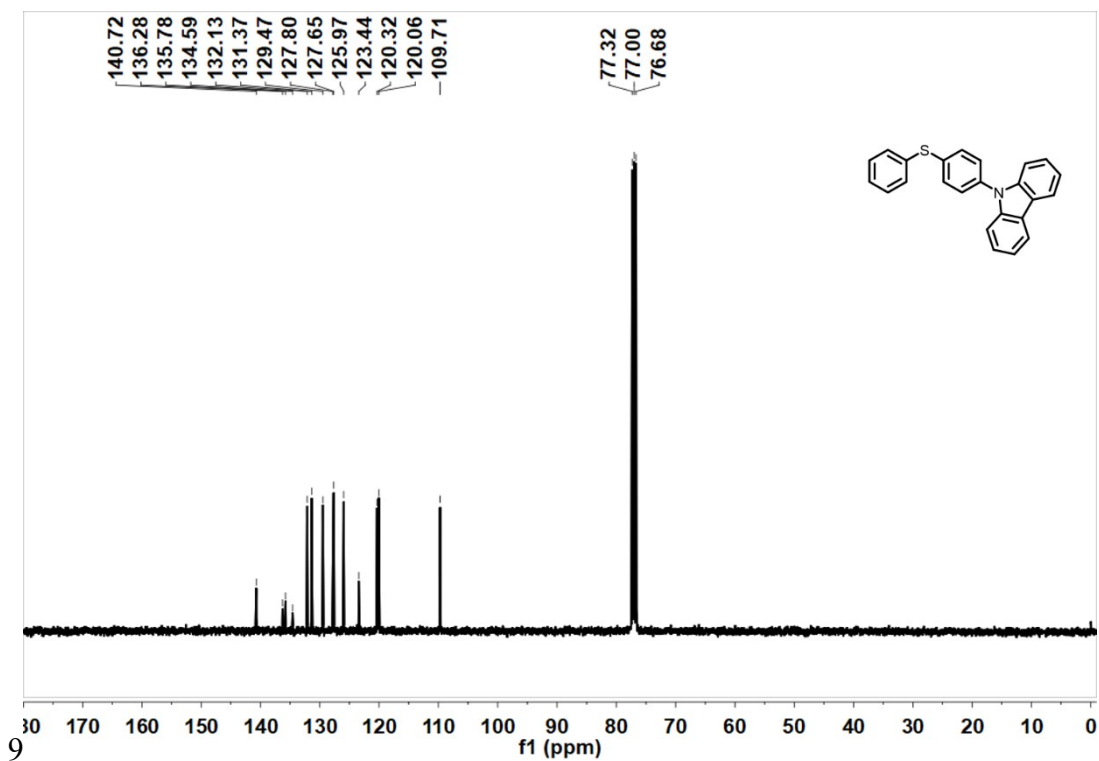

Fig. S41 The  $^{13}\text{C}$  NMR spectrum of PSpCz in  $\text{CDCl}_3$ .

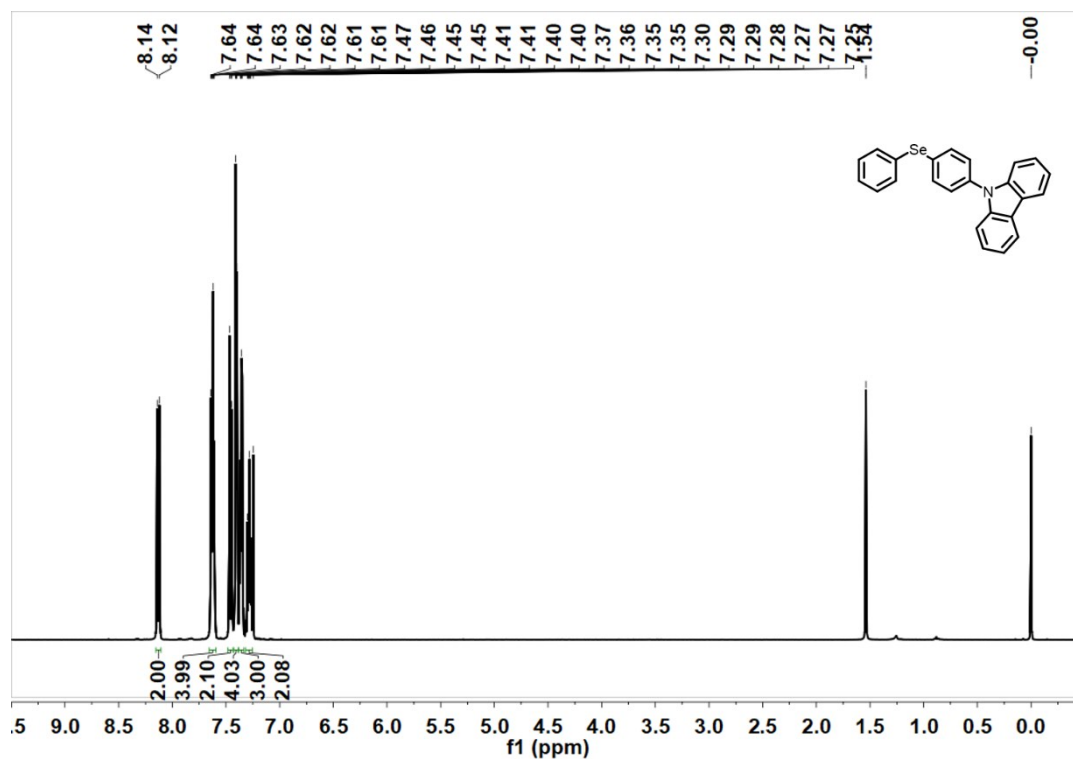

Fig. S42 The  $^1\text{H}$  NMR spectrum of PSePCz in  $\text{CDCl}_3$ .

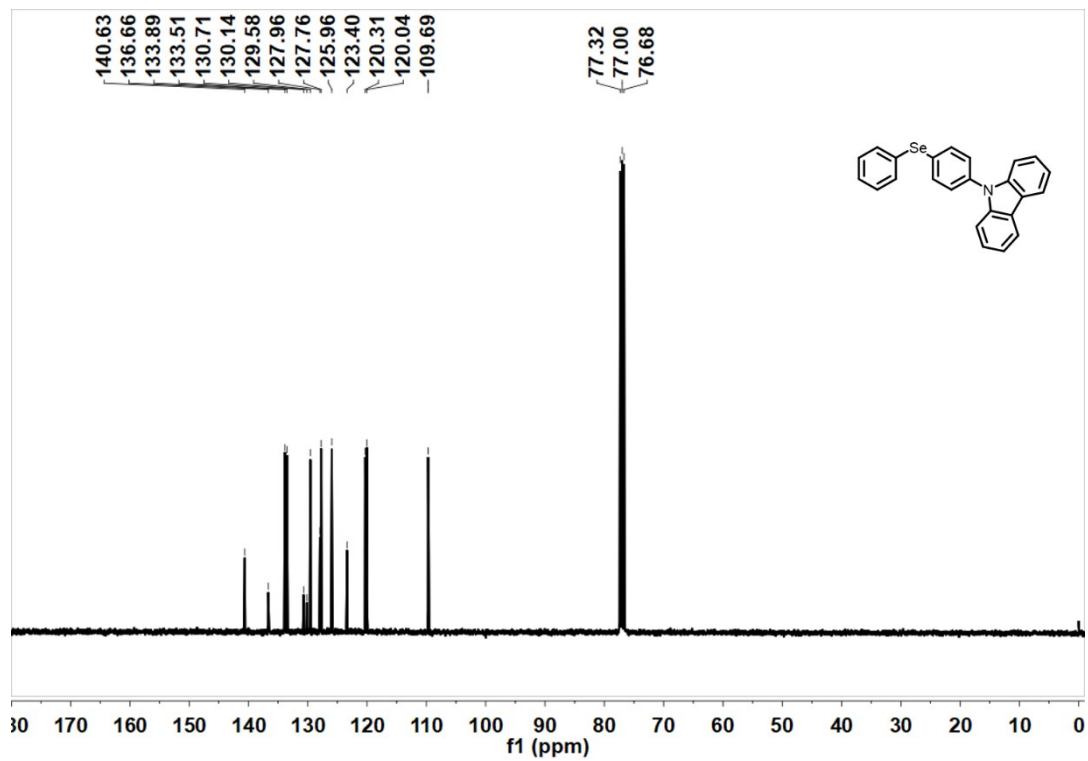

Fig. S43 The  $^{13}\text{C}$  NMR spectrum of PSePCz in  $\text{CDCl}_3$ .

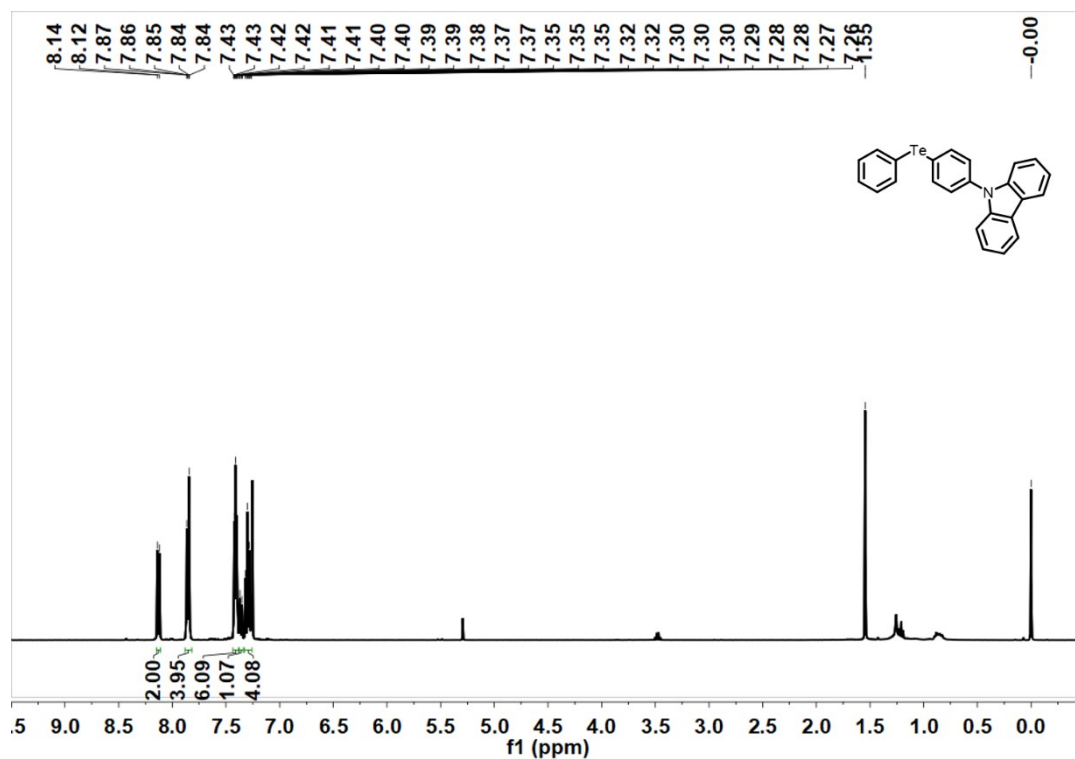

Fig. S44 The  $^1\text{H}$  NMR spectrum of PTePCz in  $\text{CDCl}_3$ .

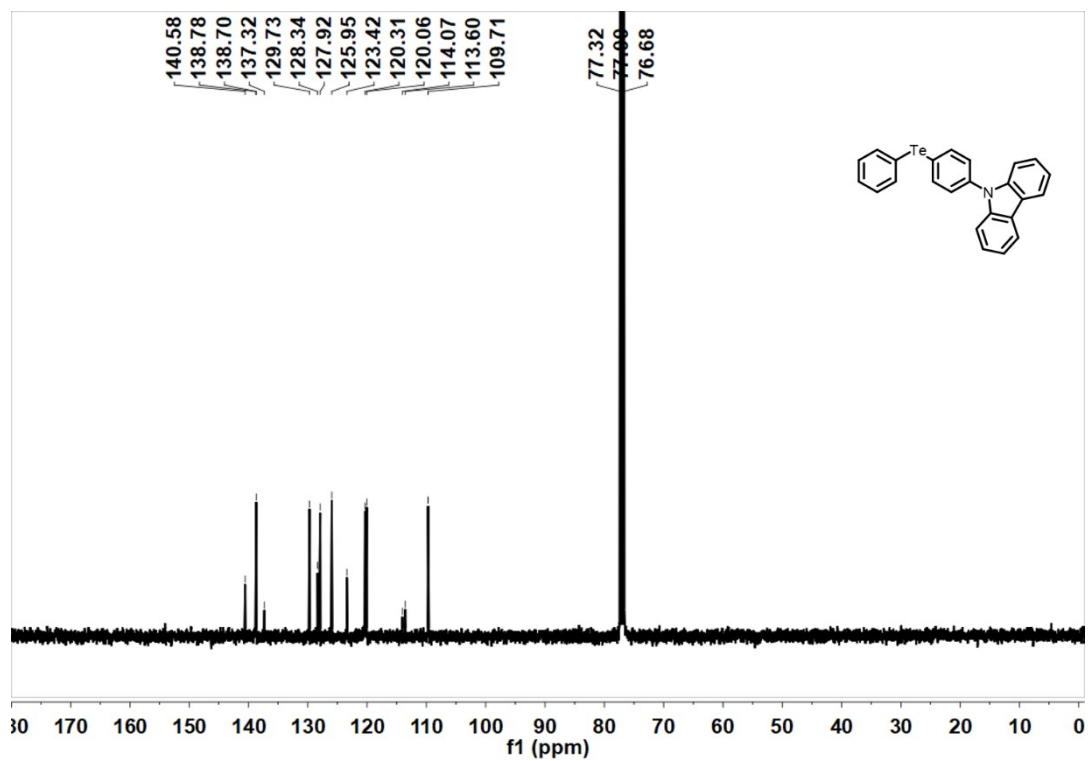

Fig. S45 The  $^{13}\text{C}$  NMR spectrum of PTePCz in  $\text{CDCl}_3$ .



## 21. Coordinates of molecular structures

**Table S8.** Cartesian coordinates of optimized geometry of **POPCz** (DFT, TD-PBE0/6-311G\*\*) Standard orientation: (Ground State)

| Center Number | Atomic Number | Atomic Type | Coordinates (Angstroms) |           |           |
|---------------|---------------|-------------|-------------------------|-----------|-----------|
|               |               |             | X                       | Y         | Z         |
| 1             | 6             | 0           | 5.733370                | 1.638854  | 0.089956  |
| 2             | 1             | 0           | 5.775909                | 2.693376  | 0.341606  |
| 3             | 8             | 0           | 3.591060                | -1.287182 | 0.647187  |
| 4             | 6             | 0           | 1.845607                | -0.133231 | -0.583914 |
| 5             | 1             | 0           | 2.555151                | 0.251714  | -1.307028 |
| 6             | 6             | 0           | 0.490935                | 0.134180  | -0.721151 |
| 7             | 1             | 0           | 0.136446                | 0.725712  | -1.558284 |
| 8             | 6             | 0           | -2.577553               | 3.552348  | 0.196688  |
| 9             | 1             | 0           | -2.127329               | 4.532437  | 0.315266  |
| 10            | 6             | 0           | 0.023851                | -1.149621 | 1.258686  |
| 11            | 1             | 0           | -0.689339               | -1.527696 | 1.982949  |
| 12            | 6             | 0           | 1.373038                | -1.433402 | 1.393622  |
| 13            | 1             | 0           | 1.741167                | -2.043108 | 2.210631  |
| 14            | 6             | 0           | -2.724043               | -2.404168 | -0.185048 |
| 15            | 1             | 0           | -1.766812               | -2.909477 | -0.125603 |
| 16            | 6             | 0           | -3.901444               | -3.115781 | -0.358582 |
| 17            | 1             | 0           | -3.858810               | -4.197664 | -0.429326 |
| 18            | 6             | 0           | 4.650683                | 0.880415  | 0.514834  |
| 19            | 1             | 0           | 3.851005                | 1.326508  | 1.095852  |
| 20            | 6             | 0           | 2.285591                | -0.920355 | 0.476784  |
| 21            | 7             | 0           | -1.804879               | -0.078324 | 0.059336  |
| 22            | 6             | 0           | -2.374757               | 1.187456  | 0.062688  |
| 23            | 6             | 0           | -1.764573               | 2.429184  | 0.217602  |
| 24            | 1             | 0           | -0.692741               | 2.514985  | 0.355304  |
| 25            | 6             | 0           | -3.963570               | 3.448431  | 0.029763  |
| 26            | 1             | 0           | -4.569114               | 4.348084  | 0.016755  |
| 27            | 6             | 0           | -2.814945               | -1.017618 | -0.098384 |
| 28            | 6             | 0           | -3.772360               | 1.062771  | -0.095988 |
| 29            | 6             | 0           | 6.762322                | 1.054840  | -0.641136 |
| 30            | 1             | 0           | 7.606618                | 1.652466  | -0.966498 |
| 31            | 6             | 0           | 4.601118                | -0.472158 | 0.192772  |
| 32            | 6             | 0           | -0.427407               | -0.364119 | 0.199338  |

|    |   |   |           |           |           |
|----|---|---|-----------|-----------|-----------|
| 33 | 6 | 0 | -5.139996 | -2.469396 | -0.448146 |
| 34 | 1 | 0 | -6.041158 | -3.057692 | -0.582488 |
| 35 | 6 | 0 | -5.222380 | -1.088470 | -0.372102 |
| 36 | 1 | 0 | -6.182725 | -0.588978 | -0.450235 |
| 37 | 6 | 0 | -4.054027 | -0.347843 | -0.197626 |
| 38 | 6 | 0 | -4.565980 | 2.208982  | -0.113463 |
| 39 | 1 | 0 | -5.641617 | 2.130296  | -0.234604 |
| 40 | 6 | 0 | 5.622809  | -1.067511 | -0.534666 |
| 41 | 1 | 0 | 5.556646  | -2.125617 | -0.760759 |
| 42 | 6 | 0 | 6.704968  | -0.299628 | -0.946429 |
| 43 | 1 | 0 | 7.504836  | -0.764580 | -1.512968 |

---

|                                              |             |
|----------------------------------------------|-------------|
| Zero-point correction=                       | 0.343425    |
| Thermal correction to Energy=                | 0.362683    |
| Thermal correction to Enthalpy=              | 0.363627    |
| Thermal correction to Gibbs Free Energy=     | 0.292661    |
| Sum of electronic and zero-point Energies=   | -1053.44466 |
| Sum of electronic and thermal Energies=      | -1053.42540 |
| Sum of electronic and thermal Enthalpies=    | -1053.42446 |
| Sum of electronic and thermal Free Energies= | -1053.49543 |

**Table S9.** Cartesian coordinates of optimized geometry of **PSPCz** (DFT, TD-PBE0/6-311G\*\*) Standard orientation: (Ground State)

| Center Number | Atomic Number | Atomic Type | Coordinates (Angstroms) |           |           |
|---------------|---------------|-------------|-------------------------|-----------|-----------|
|               |               |             | X                       | Y         | Z         |
| 1             | 7             | 0           | -1.978652               | -0.087636 | -0.001904 |
| 2             | 16            | 0           | 3.709323                | -1.923786 | 0.148322  |
| 3             | 6             | 0           | 4.378491                | 0.684217  | 0.838084  |
| 4             | 1             | 0           | 3.531117                | 0.657071  | 1.514437  |
| 5             | 6             | 0           | 4.661670                | -0.423272 | 0.038135  |
| 6             | 6             | 0           | 5.759035                | -0.397130 | -0.820077 |
| 7             | 1             | 0           | 5.969155                | -1.256166 | -1.448234 |
| 8             | 6             | 0           | 1.603300                | -0.423131 | -0.866982 |
| 9             | 1             | 0           | 2.303646                | -0.053955 | -1.608010 |
| 10            | 6             | 0           | 2.038719                | -1.317011 | 0.112345  |
| 11            | 6             | 0           | 1.127881                | -1.805308 | 1.046817  |
| 12            | 1             | 0           | 1.466378                | -2.486298 | 1.820106  |
| 13            | 6             | 0           | -0.200150               | -1.401982 | 1.009549  |
| 14            | 1             | 0           | -0.902237               | -1.761727 | 1.753627  |
| 15            | 6             | 0           | -0.631830               | -0.504625 | 0.036107  |
| 16            | 6             | 0           | 6.571698                | 0.729784  | -0.872179 |
| 17            | 1             | 0           | 7.426157                | 0.742547  | -1.540763 |
| 18            | 6             | 0           | 6.282015                | 1.838862  | -0.088396 |
| 19            | 1             | 0           | 6.911140                | 2.721045  | -0.138232 |
| 20            | 6             | 0           | 5.180319                | 1.813501  | 0.761534  |
| 21            | 1             | 0           | 4.951873                | 2.674301  | 1.381509  |
| 22            | 6             | 0           | -2.420180               | 1.230758  | 0.015023  |
| 23            | 6             | 0           | -1.683837               | 2.409029  | 0.104294  |
| 24            | 1             | 0           | -0.601893               | 2.394309  | 0.165956  |
| 25            | 6             | 0           | -3.830580               | 1.242427  | -0.035094 |
| 26            | 6             | 0           | -3.087698               | -0.924474 | -0.062018 |
| 27            | 6             | 0           | -3.144742               | -2.313617 | -0.134379 |
| 28            | 1             | 0           | -2.243245               | -2.915152 | -0.142199 |
| 29            | 6             | 0           | 0.279548                | -0.018256 | -0.902870 |
| 30            | 1             | 0           | -0.063803               | 0.659549  | -1.676723 |
| 31            | 6             | 0           | -4.397839               | -2.903181 | -0.207555 |
| 32            | 1             | 0           | -4.469339               | -3.984304 | -0.264292 |
| 33            | 6             | 0           | -5.568034               | -2.135415 | -0.214342 |
| 34            | 1             | 0           | -6.531507               | -2.630090 | -0.270605 |

|    |   |   |           |           |           |
|----|---|---|-----------|-----------|-----------|
| 35 | 6 | 0 | -5.504125 | -0.752745 | -0.157485 |
| 36 | 1 | 0 | -6.411641 | -0.157840 | -0.174489 |
| 37 | 6 | 0 | -4.256958 | -0.134287 | -0.083629 |
| 38 | 6 | 0 | -4.509535 | 2.459820  | -0.016552 |
| 39 | 1 | 0 | -5.593799 | 2.484148  | -0.055083 |
| 40 | 6 | 0 | -3.781666 | 3.636332  | 0.056331  |
| 41 | 1 | 0 | -4.296829 | 4.590580  | 0.069334  |
| 42 | 6 | 0 | -2.383947 | 3.605992  | 0.120883  |
| 43 | 1 | 0 | -1.833113 | 4.538299  | 0.188550  |

---

|                                              |              |
|----------------------------------------------|--------------|
| Zero-point correction=                       | 0.340588     |
| Thermal correction to Energy=                | 0.360518     |
| Thermal correction to Enthalpy=              | 0.361462     |
| Thermal correction to Gibbs Free Energy=     | 0.288963     |
| Sum of electronic and zero-point Energies=   | -1376.349291 |
| Sum of electronic and thermal Energies=      | -1376.329361 |
| Sum of electronic and thermal Enthalpies=    | -1376.328417 |
| Sum of electronic and thermal Free Energies= | -1376.400915 |

**Table S10.** Cartesian coordinates of optimized geometry of **PSePCz** (DFT, TD-PBE0/6-311G\*\*) Standard orientation: (Ground State)

| Center Number | Atomic Number | Atomic Type | Coordinates (Angstroms) |           |           |
|---------------|---------------|-------------|-------------------------|-----------|-----------|
|               |               |             | X                       | Y         | Z         |
| 1             | 7             | 0           | -2.335561               | -0.042732 | -0.039882 |
| 2             | 34            | 0           | 3.555834                | -1.689839 | -0.081070 |
| 3             | 6             | 0           | -0.472840               | -1.262181 | 0.936555  |
| 4             | 1             | 0           | -1.129505               | -1.615789 | 1.723736  |
| 5             | 6             | 0           | 0.869415                | -1.620332 | 0.928614  |
| 6             | 1             | 0           | 1.262700                | -2.259976 | 1.711110  |
| 7             | 6             | 0           | 1.719872                | -1.135967 | -0.061980 |
| 8             | 6             | 0           | 1.213089                | -0.296707 | -1.053941 |
| 9             | 1             | 0           | 1.866285                | 0.066273  | -1.839611 |
| 10            | 6             | 0           | 4.408522                | 0.026502  | 0.047301  |
| 11            | 6             | 0           | 3.867165                | 1.064794  | 0.802428  |
| 12            | 1             | 0           | 2.918219                | 0.930746  | 1.310034  |
| 13            | 6             | 0           | 4.547002                | 2.271705  | 0.900428  |
| 14            | 1             | 0           | 4.118256                | 3.079156  | 1.485242  |
| 15            | 6             | 0           | -0.125364               | 0.062046  | -1.047060 |
| 16            | 1             | 0           | -0.525882               | 0.697543  | -1.829280 |
| 17            | 6             | 0           | -0.976298               | -0.416840 | -0.049357 |
| 18            | 6             | 0           | -3.419811               | -0.913301 | -0.001148 |
| 19            | 6             | 0           | -4.612421               | -0.158824 | 0.005159  |
| 20            | 6             | 0           | -4.227361               | 1.230429  | -0.030593 |
| 21            | 6             | 0           | -2.816820               | 1.262266  | -0.057595 |
| 22            | 6             | 0           | -2.114747               | 2.464562  | -0.058878 |
| 23            | 1             | 0           | -1.031182               | 2.485277  | -0.055838 |
| 24            | 6             | 0           | -2.850864               | 3.639908  | -0.054732 |
| 25            | 1             | 0           | -2.327006               | 4.590026  | -0.056998 |
| 26            | 6             | 0           | -4.250206               | 3.626298  | -0.043756 |
| 27            | 1             | 0           | -4.793986               | 4.564606  | -0.042889 |
| 28            | 6             | 0           | -4.942970               | 2.426729  | -0.026815 |
| 29            | 1             | 0           | -6.027941               | 2.417063  | -0.006568 |
| 30            | 6             | 0           | -5.842034               | -0.815156 | 0.025857  |
| 31            | 1             | 0           | -6.767015               | -0.247586 | 0.030787  |
| 32            | 6             | 0           | -4.674152               | -2.933184 | 0.012402  |
| 33            | 1             | 0           | -4.715021               | -4.017350 | 0.007677  |
| 34            | 6             | 0           | -3.437730               | -2.305386 | -0.008509 |

|    |   |   |           |           |           |
|----|---|---|-----------|-----------|-----------|
| 35 | 1 | 0 | -2.520162 | -2.881354 | -0.038940 |
| 36 | 6 | 0 | -5.866163 | -2.200235 | 0.034424  |
| 37 | 1 | 0 | -6.815530 | -2.724167 | 0.052211  |
| 38 | 6 | 0 | 5.633261  | 0.197433  | -0.594820 |
| 39 | 1 | 0 | 6.047857  | -0.604733 | -1.196737 |
| 40 | 6 | 0 | 6.316402  | 1.401828  | -0.472995 |
| 41 | 1 | 0 | 7.270504  | 1.527922  | -0.974322 |
| 42 | 6 | 0 | 5.774351  | 2.443584  | 0.269260  |
| 43 | 1 | 0 | 6.304179  | 3.386180  | 0.354450  |

---

|                                              |              |
|----------------------------------------------|--------------|
| Zero-point correction=                       | 0.339415     |
| Thermal correction to Energy=                | 0.359814     |
| Thermal correction to Enthalpy=              | 0.360759     |
| Thermal correction to Gibbs Free Energy=     | 0.286248     |
| Sum of electronic and zero-point Energies=   | -3379.517024 |
| Sum of electronic and thermal Energies=      | -3379.496625 |
| Sum of electronic and thermal Enthalpies=    | -3379.495681 |
| Sum of electronic and thermal Free Energies= | -3379.570192 |

**Table S11.** Cartesian coordinates of optimized geometry of **PTePCz** (DFT, TD-PBE0/LANL08(d) + 6-311G\*\*) Standard orientation: (Ground State)

| Center Number | Atomic Number | Atomic Type | Coordinates (Angstroms) |           |           |
|---------------|---------------|-------------|-------------------------|-----------|-----------|
|               |               |             | X                       | Y         | Z         |
| 1             | 7             | 0           | -2.688429               | -0.006362 | 0.024498  |
| 2             | 6             | 0           | -0.873701               | -1.305524 | 0.992087  |
| 3             | 1             | 0           | -1.592112               | -1.818561 | 1.622340  |
| 4             | 6             | 0           | 0.477866                | -1.608775 | 1.079277  |
| 5             | 1             | 0           | 0.804079                | -2.365079 | 1.786658  |
| 6             | 6             | 0           | 1.407124                | -0.927769 | 0.293240  |
| 7             | 6             | 0           | 0.964546                | 0.061493  | -0.583211 |
| 8             | 1             | 0           | 1.672657                | 0.595783  | -1.207578 |
| 9             | 6             | 0           | 4.231643                | 0.409369  | -0.169235 |
| 10            | 6             | 0           | 4.171104                | 1.505189  | 0.693208  |
| 11            | 1             | 0           | 3.714935                | 1.399669  | 1.671438  |
| 12            | 6             | 0           | 4.694167                | 2.729644  | 0.296553  |
| 13            | 1             | 0           | 4.639901                | 3.579883  | 0.968683  |
| 14            | 6             | 0           | -0.386898               | 0.363321  | -0.672691 |
| 15            | 1             | 0           | -0.732637               | 1.119805  | -1.369098 |
| 16            | 6             | 0           | -1.314208               | -0.317797 | 0.113862  |
| 17            | 6             | 0           | -3.706602               | -0.905301 | -0.268784 |
| 18            | 6             | 0           | -4.940362               | -0.219242 | -0.262888 |
| 19            | 6             | 0           | -4.648631               | 1.158145  | 0.048615  |
| 20            | 6             | 0           | -3.250212               | 1.249511  | 0.219173  |
| 21            | 6             | 0           | -2.633691               | 2.449658  | 0.562836  |
| 22            | 1             | 0           | -1.561870               | 2.509064  | 0.712859  |
| 23            | 6             | 0           | -3.440786               | 3.566893  | 0.715680  |
| 24            | 1             | 0           | -2.984795               | 4.514508  | 0.982834  |
| 25            | 6             | 0           | -4.827341               | 3.497340  | 0.537193  |
| 26            | 1             | 0           | -5.428031               | 4.391506  | 0.663098  |
| 27            | 6             | 0           | -5.436436               | 2.297233  | 0.208395  |
| 28            | 1             | 0           | -6.512754               | 2.242644  | 0.080475  |
| 29            | 6             | 0           | -6.115002               | -0.914932 | -0.545713 |
| 30            | 1             | 0           | -7.070997               | -0.401239 | -0.545043 |
| 31            | 6             | 0           | -4.810770               | -2.930006 | -0.846861 |
| 32            | 1             | 0           | -4.776323               | -3.988226 | -1.083972 |
| 33            | 6             | 0           | -3.627424               | -2.262479 | -0.569285 |
| 34            | 1             | 0           | -2.674796               | -2.778934 | -0.593812 |

|    |    |   |           |           |           |
|----|----|---|-----------|-----------|-----------|
| 35 | 6  | 0 | -6.044279 | -2.268536 | -0.832158 |
| 36 | 1  | 0 | -6.950357 | -2.822273 | -1.052613 |
| 37 | 6  | 0 | 4.832861  | 0.545305  | -1.420403 |
| 38 | 1  | 0 | 4.877378  | -0.302891 | -2.095016 |
| 39 | 6  | 0 | 5.367343  | 1.770866  | -1.805732 |
| 40 | 1  | 0 | 5.835009  | 1.870519  | -2.779833 |
| 41 | 6  | 0 | 5.295372  | 2.862919  | -0.950517 |
| 42 | 1  | 0 | 5.709304  | 3.818784  | -1.254079 |
| 43 | 52 | 0 | 3.452621  | -1.468454 | 0.429333  |

---

|                                              |             |
|----------------------------------------------|-------------|
| Zero-point correction=                       | 0.338460    |
| Thermal correction to Energy=                | 0.359271    |
| Thermal correction to Enthalpy=              | 0.360215    |
| Thermal correction to Gibbs Free Energy=     | 0.283458    |
| Sum of electronic and zero-point Energies=   | -986.337128 |
| Sum of electronic and thermal Energies=      | -986.316317 |
| Sum of electronic and thermal Enthalpies=    | -986.315373 |
| Sum of electronic and thermal Free Energies= | -986.392130 |



## Reference

- (1) Kumar, A.; Bhakuni, B. S.; Prasad, C. D.; Kumar, S.; Kumar, S. *Tetrahedron* **2013**, *69*, 5383.
- (2) Kumar, A.; Kumar, S. *Tetrahedron* **2014**, *70*, 1763.
- (3) Yu, F.; Li, P.; Wang, B.; Han, K. *J. Am. Chem. Soc.* **2013**, *135*, 7674.
- (4) Xue, P.; Sun, J.; Chen, P.; Wang, P.; Yao, B.; Gong, P.; Zhang, Z.; Lu, R. *Chem. Commun.* **2015**, *51*, 10381.
- (5) Li, C.; Tang, X.; Zhang, L.; Li, C.; Liu, Z.; Bo, Z.; Dong, Y. Q.; Tian, Y. H.; Dong, Y.; Tang, B. Z. *Adv. Opt. Mater.* **2015**, *3*, 1184.
- (6) An, Z.; Zheng, C.; Tao, Y.; Chen, R.; Shi, H.; Chen, T.; Wang, Z.; Li, H.; Deng, R.; Liu, X.; Huang, W. *Nat. Mater.* **2015**, *14*, 685.
- (7) Yang, Z.; Mao, Z.; Zhang, X.; Ou, D.; Mu, Y.; Zhang, Y.; Zhao, C.; Liu, S.; Chi, Z.; Xu, J.; Wu, Y. C.; Lu, P. Y.; Lien, A.; Bryce, M. R. *Angew. Chem., Int. Ed.* **2016**, *55*, 2181.
- (8) Xie, Y.; Ge, Y.; Peng, Q.; Li, C.; Li, Q.; Li, Z. *Adv. Mater.* **2017**, *29*, 1606829.
- (9) Lucenti, E.; Forni, A.; Botta, C.; Carlucci, L.; Giannini, C.; Marinotto, D.; Pavanello, A.; Previtali, A.; Righetto, S.; Cariati, E. *Angew. Chem., Int. Ed.* **2017**, *56*, 16302.
- (10) Cai, S.; Shi, H.; Tian, D.; Ma, H.; Cheng, Z.; Wu, Q.; Gu, M.; Huang, L.; An, Z.; Peng, Q.; Huang, W. *Adv. Funct. Mater.* **2018**, 1705045.
- (11) Frisch, M.; Trucks, G.; Schlegel, H. B.; Scuseria, G.; Robb, M.; Cheeseman, J.; Scalmani, G.; Barone, V.; Mennucci, B.; Petersson, G. *Inc., Wallingford, CT* **2009**, 200.
- (12) Lu, T.; Chen, F. *J. Comput. Chem.* **2012**, *33*, 580.
- (13) Lu, T. C. *Acta Chim. Sinica* **2011**, *20*, 2393.
- (14) Liu, W. J.; Hong, G. Y.; Dai, D. D.; Li, L. M.; Dolg, M. *Theor. Chem. Acc.* **1997**, *96*, 75.
- (15) Liu, W. J.; Wang, F.; Li, L. M. *J. Theor. Comput. Chem.* **2003**, *2*, 257.
- (16) Xue, J.; Zhou, Z. K.; Wei, Z.; Su, R.; Lai, J.; Li, J.; Li, C.; Zhang, T.; Wang, X. H. *Nat. Commun.* **2015**, *6*, 8906.
- (17) Burgess, I. B.; Mishchenko, L.; Hatton, B. D.; Kolle, M.; Loncar, M.; Aizenberg, J. *J. Am. Chem. Soc.* **2011**, *133*, 12430.
